# Supplementary material for: Ground-dwelling invertebrate diversity in domestic gardens along a rural-urban gradient: Landscape characteristics are more important than garden characteristics
Source: PubMed Central journal article supplement (PMC7531831; doi:10.1371/journal.pone.0240061), 2020-10-02

# PLOS ONE

## Ground-dwelling invertebrate diversity in domestic gardens along a rural-urban gradient: landscape characteristics are more important than garden characteristics --Manuscript Draft--

|                                                                                      |                                                                                                                                                                                                                                                                                                                                                                                                                                                                                                                                                                                                                                                                                                                                                                                                                                                                                                                                                                                                                                                                                                                                                                                                                                                                                                                                                                                                                                                                                                                                                                                                                                                                                                                                                                                                                                                                                                                                                                                                                                                                                                                                                                   |
|--------------------------------------------------------------------------------------|-------------------------------------------------------------------------------------------------------------------------------------------------------------------------------------------------------------------------------------------------------------------------------------------------------------------------------------------------------------------------------------------------------------------------------------------------------------------------------------------------------------------------------------------------------------------------------------------------------------------------------------------------------------------------------------------------------------------------------------------------------------------------------------------------------------------------------------------------------------------------------------------------------------------------------------------------------------------------------------------------------------------------------------------------------------------------------------------------------------------------------------------------------------------------------------------------------------------------------------------------------------------------------------------------------------------------------------------------------------------------------------------------------------------------------------------------------------------------------------------------------------------------------------------------------------------------------------------------------------------------------------------------------------------------------------------------------------------------------------------------------------------------------------------------------------------------------------------------------------------------------------------------------------------------------------------------------------------------------------------------------------------------------------------------------------------------------------------------------------------------------------------------------------------|
| <b>Manuscript Number:</b>                                                            | PONE-D-20-14585                                                                                                                                                                                                                                                                                                                                                                                                                                                                                                                                                                                                                                                                                                                                                                                                                                                                                                                                                                                                                                                                                                                                                                                                                                                                                                                                                                                                                                                                                                                                                                                                                                                                                                                                                                                                                                                                                                                                                                                                                                                                                                                                                   |
| <b>Article Type:</b>                                                                 | Research Article                                                                                                                                                                                                                                                                                                                                                                                                                                                                                                                                                                                                                                                                                                                                                                                                                                                                                                                                                                                                                                                                                                                                                                                                                                                                                                                                                                                                                                                                                                                                                                                                                                                                                                                                                                                                                                                                                                                                                                                                                                                                                                                                                  |
| <b>Full Title:</b>                                                                   | Ground-dwelling invertebrate diversity in domestic gardens along a rural-urban gradient: landscape characteristics are more important than garden characteristics                                                                                                                                                                                                                                                                                                                                                                                                                                                                                                                                                                                                                                                                                                                                                                                                                                                                                                                                                                                                                                                                                                                                                                                                                                                                                                                                                                                                                                                                                                                                                                                                                                                                                                                                                                                                                                                                                                                                                                                                 |
| <b>Short Title:</b>                                                                  | Ground-dwelling invertebrate diversity in domestic gardens                                                                                                                                                                                                                                                                                                                                                                                                                                                                                                                                                                                                                                                                                                                                                                                                                                                                                                                                                                                                                                                                                                                                                                                                                                                                                                                                                                                                                                                                                                                                                                                                                                                                                                                                                                                                                                                                                                                                                                                                                                                                                                        |
| <b>Corresponding Author:</b>                                                         | Brigitte Braschler, Ph.D.<br>Section of Conservation Biology, University of Basel<br>Basel, SWITZERLAND                                                                                                                                                                                                                                                                                                                                                                                                                                                                                                                                                                                                                                                                                                                                                                                                                                                                                                                                                                                                                                                                                                                                                                                                                                                                                                                                                                                                                                                                                                                                                                                                                                                                                                                                                                                                                                                                                                                                                                                                                                                           |
| <b>Keywords:</b>                                                                     | biodiversity, inconspicuous species, green infrastructure, low-mobility, multiple-species approach, urban ecology, urbanization, private garden management                                                                                                                                                                                                                                                                                                                                                                                                                                                                                                                                                                                                                                                                                                                                                                                                                                                                                                                                                                                                                                                                                                                                                                                                                                                                                                                                                                                                                                                                                                                                                                                                                                                                                                                                                                                                                                                                                                                                                                                                        |
| <b>Abstract:</b>                                                                     | <p>Urbanisation is increasing worldwide and is regarded a major driver of environmental change altering local species assemblages. Private domestic gardens contribute a significant share of total green area in cities, but their biodiversity has received relatively little attention. Previous studies mainly considered plants, flying invertebrates such as bees and butterflies, and birds. By using a multi-taxa approach focused on less mobile, ground-dwelling invertebrates, we examined the influence of local garden characteristics and landscape characteristics on species richness and abundance of gastropods, spiders, millipedes, woodlice, ants, ground beetles and rove beetles. We assume that most of the species of these groups are able to complete their entire life cycle within a single garden. We conducted field surveys in thirty-five domestic gardens along a rural-urban gradient in Basel, Switzerland. Considered together, the gardens examined harboured an impressive species richness, with a mean share of species of the corresponding groups known for Switzerland of 13.9%, ranging from 4.7% in ground beetles to 23.3% in woodlice. The overall high biodiversity is a result of complementary contributions of gardens harbouring distinct species assemblages. Indeed, at the garden level, species richness of different taxonomical groups were typically not inter-correlated. The exception was ant species richness, which was correlated with those of gastropods and spiders. Generalised linear models revealed that distance to the city centre is an important driver of species richness, abundance and composition of several groups, resulting in an altered species composition in inner city gardens. Local garden characteristics were important drivers of gastropod and ant species richness, and the abundance of spiders, millipedes and rove beetles. Our study shows that domestic gardens make a valuable contribution to regional biodiversity. Thus, domestic urban gardens constitute an important part of green infrastructure, which should be considered by urban planners.</p> |
| <b>Order of Authors:</b>                                                             | Brigitte Braschler, Ph.D.<br>José D. Gilgado<br>Valerie Zwahlen<br>Hans-Peter Rusterholz<br>Sascha Buchholz<br>Bruno Baur                                                                                                                                                                                                                                                                                                                                                                                                                                                                                                                                                                                                                                                                                                                                                                                                                                                                                                                                                                                                                                                                                                                                                                                                                                                                                                                                                                                                                                                                                                                                                                                                                                                                                                                                                                                                                                                                                                                                                                                                                                         |
| <b>Additional Information:</b>                                                       |                                                                                                                                                                                                                                                                                                                                                                                                                                                                                                                                                                                                                                                                                                                                                                                                                                                                                                                                                                                                                                                                                                                                                                                                                                                                                                                                                                                                                                                                                                                                                                                                                                                                                                                                                                                                                                                                                                                                                                                                                                                                                                                                                                   |
| <b>Question</b>                                                                      | <b>Response</b>                                                                                                                                                                                                                                                                                                                                                                                                                                                                                                                                                                                                                                                                                                                                                                                                                                                                                                                                                                                                                                                                                                                                                                                                                                                                                                                                                                                                                                                                                                                                                                                                                                                                                                                                                                                                                                                                                                                                                                                                                                                                                                                                                   |
| <b>Financial Disclosure</b>                                                          | The authors received no specific funding for this work.                                                                                                                                                                                                                                                                                                                                                                                                                                                                                                                                                                                                                                                                                                                                                                                                                                                                                                                                                                                                                                                                                                                                                                                                                                                                                                                                                                                                                                                                                                                                                                                                                                                                                                                                                                                                                                                                                                                                                                                                                                                                                                           |
| Enter a financial disclosure statement that describes the sources of funding for the |                                                                                                                                                                                                                                                                                                                                                                                                                                                                                                                                                                                                                                                                                                                                                                                                                                                                                                                                                                                                                                                                                                                                                                                                                                                                                                                                                                                                                                                                                                                                                                                                                                                                                                                                                                                                                                                                                                                                                                                                                                                                                                                                                                   |

work included in this submission. Review the [submission guidelines](#) for detailed requirements. View published research articles from [PLOS ONE](#) for specific examples.

This statement is required for submission and **will appear in the published article** if the submission is accepted. Please make sure it is accurate.

#### Unfunded studies

Enter: *The author(s) received no specific funding for this work.*

#### Funded studies

Enter a statement with the following details:

- Initials of the authors who received each award
- Grant numbers awarded to each author
- The full name of each funder
- URL of each funder website
- Did the sponsors or funders play any role in the study design, data collection and analysis, decision to publish, or preparation of the manuscript?
- **NO** - Include this sentence at the end of your statement: *The funders had no role in study design, data collection and analysis, decision to publish, or preparation of the manuscript.*
- **YES** - Specify the role(s) played.

\* typeset

#### Competing Interests

Use the instructions below to enter a competing interest statement for this submission. On behalf of all authors, disclose any [competing interests](#) that could be perceived to bias this work—acknowledging all financial support and any other relevant financial or non-financial competing interests.

This statement **will appear in the published article** if the submission is accepted. Please make sure it is accurate. View published research articles from [PLOS ONE](#) for specific examples.

The authors have declared that no competing interests exist.

**NO authors have competing interests**

Enter: *The authors have declared that no competing interests exist.*

**Authors with competing interests**

Enter competing interest details beginning with this statement:

*I have read the journal's policy and the authors of this manuscript have the following competing interests: [insert competing interests here]*

\* typeset

**Ethics Statement**

Enter an ethics statement for this submission. This statement is required if the study involved:

- Human participants
- Human specimens or tissue
- Vertebrate animals or cephalopods
- Vertebrate embryos or tissues
- Field research

Write "N/A" if the submission does not require an ethics statement.

General guidance is provided below. Consult the [submission guidelines](#) for detailed instructions. **Make sure that all information entered here is included in the Methods section of the manuscript.**

The study focused on invertebrate species richness, species composition and abundance of sites in a widespread man-made habitat type, namely domestic gardens. We also recorded data on local and landscape-scale environmental characteristics as explanatory variables. However, we did not collect any personal data on garden owners. We do not present any data that could lead to the identification of single gardens or their owners. Therefore, no ethics review is required.

**Format for specific study types**

**Human Subject Research (involving human participants and/or tissue)**

- Give the name of the institutional review board or ethics committee that approved the study
- Include the approval number and/or a statement indicating approval of this research
- Indicate the form of consent obtained (written/oral) or the reason that consent was not obtained (e.g. the data were analyzed anonymously)

**Animal Research (involving vertebrate animals, embryos or tissues)**

- Provide the name of the Institutional Animal Care and Use Committee (IACUC) or other relevant ethics board that reviewed the study protocol, and indicate whether they approved this research or granted a formal waiver of ethical approval
- Include an approval number if one was obtained
- If the study involved *non-human primates*, add *additional details* about animal welfare and steps taken to ameliorate suffering
- If anesthesia, euthanasia, or any kind of animal sacrifice is part of the study, include briefly which substances and/or methods were applied

**Field Research**

Include the following details if this study involves the collection of plant, animal, or other materials from a natural setting:

- Field permit number
- Name of the institution or relevant body that granted permission

**Data Availability**

Authors are required to make all data underlying the findings described fully available, without restriction, and from the time of publication. PLOS allows rare exceptions to address legal and ethical concerns. See the [PLOS Data Policy](#) and [FAQ](#) for detailed information.

Yes - all data are fully available without restriction

A Data Availability Statement describing where the data can be found is required at submission. Your answers to this question constitute the Data Availability Statement and **will be published in the article**, if accepted.

**Important:** Stating 'data available on request from the author' is not sufficient. If your data are only available upon request, select 'No' for the first question and explain your exceptional situation in the text box.

Do the authors confirm that all data underlying the findings described in their manuscript are fully available without restriction?

**Describe where the data may be found in full sentences. If you are copying our sample text, replace any instances of XXX with the appropriate details.**

- If the data are **held or will be held in a public repository**, include URLs, accession numbers or DOIs. If this information will only be available after acceptance, indicate this by ticking the box below. For example: *All XXX files are available from the XXX database (accession number(s) XXX, XXX).*
- If the data are all contained **within the manuscript and/or Supporting Information files**, enter the following:  
*All relevant data are within the manuscript and its Supporting Information files.*
- If neither of these applies but you are able to provide **details of access elsewhere**, with or without limitations, please do so. For example:

*Data cannot be shared publicly because of [XXX]. Data are available from the XXX Institutional Data Access / Ethics Committee (contact via XXX) for researchers who meet the criteria for access to confidential data.*

*The data underlying the results presented in the study are available from (include the name of the third party*

All relevant data are within the manuscript and its Supporting Information files.

*and contact information or URL).*

- This text is appropriate if the data are owned by a third party and authors do not have permission to share the data.

\* typeset

Additional data availability information:

1 Ground-dwelling invertebrate diversity in domestic gardens  
2 along a rural-urban gradient: landscape characteristics are more  
3 important than garden characteristics

4

5 **Short title:** Ground-dwelling invertebrate diversity in domestic gardens

6

7 Brigitte Braschler<sup>1</sup>, José D. Gilgado<sup>1</sup>, Valerie Zwahlen<sup>1</sup>, Hans-Peter Rusterholz<sup>1</sup>,  
8 Sascha Buchholz<sup>2,3</sup>, Bruno Baur<sup>1</sup>

9

10 1 Section of Conservation Biology, Department of Environmental Sciences,  
11 University of Basel, Basel, Switzerland

12 2 Department of Ecology, Technische Universität Berlin, Berlin, Germany

13 3 Berlin-Brandenburg Institute of Advanced Biodiversity Research (BBIB), Berlin,  
14 Germany

15

16 Corresponding author: Brigitte Braschler, Section of Conservation Biology,  
17 Department of Environmental Sciences, University of Basel, Basel, Switzerland;  
18 [brigitte.braschler@unibas.ch](mailto:brigitte.braschler@unibas.ch)

19

20 **Author contributions**

21 Conceptualization: BBa, BBr, JDG, HPR

22 Data curation: BBr

23 Formal analysis: BBr, HPR

24 Funding acquisition: BBa

25 Investigation: BBa, BBr, JDG, HPR, VZ

26 Methodology: BBa, BBr, SB, JDG, HPR, VZ

27 Supervision: BBa, HPR

28 Visualisation: BBr, JDG, HPR

29 Writing – original draft: BBa, BBr, HPR

30 Writing – review & editing: BBa, BBr, SB, JDG, HPR, VZ

31

32 **Abstract**

33 Urbanisation is increasing worldwide and is regarded a major driver of environmental  
34 change altering local species assemblages. Private domestic gardens contribute a  
35 significant share of total green area in cities, but their biodiversity has received  
36 relatively little attention. Previous studies mainly considered plants, flying  
37 invertebrates such as bees and butterflies, and birds. By using a multi-taxa approach  
38 focused on less mobile, ground-dwelling invertebrates, we examined the influence of  
39 local garden characteristics and landscape characteristics on species richness and  
40 abundance of gastropods, spiders, millipedes, woodlice, ants, ground beetles and rove  
41 beetles. We assume that most of the species of these groups are able to complete their  
42 entire life cycle within a single garden. We conducted field surveys in thirty-five  
43 domestic gardens along a rural-urban gradient in Basel, Switzerland. Considered  
44 together, the gardens examined harboured an impressive species richness, with a  
45 mean share of species of the corresponding groups known for Switzerland of 13.9%,  
46 ranging from 4.7% in ground beetles to 23.3% in woodlice. The overall high  
47 biodiversity is a result of complementary contributions of gardens harbouring distinct  
48 species assemblages. Indeed, at the garden level, species richness of different  
49 taxonomical groups were typically not inter-correlated. The exception was ant species  
50 richness, which was correlated with those of gastropods and spiders. Generalised  
51 linear models revealed that distance to the city centre is an important driver of species  
52 richness, abundance and composition of several groups, resulting in an altered species  
53 composition in inner city gardens. Local garden characteristics were important drivers  
54 of gastropod and ant species richness, and the abundance of spiders, millipedes and  
55 rove beetles. Our study shows that domestic gardens make a valuable contribution to



56 regional biodiversity. Thus, domestic urban gardens constitute an important part of  
57 green infrastructure, which should be considered by urban planners.

58

## 59 **Introduction**

60 Urbanisation is increasing globally as more and more people move to cities, with a  
61 projected population growth of 2.5 billion people in urban areas by 2050 [1]. As a  
62 consequence, urban areas are expanding to the detriment of natural and semi-natural  
63 areas. Meanwhile, in already built up areas urban densification threatens remaining  
64 green areas [2,3]. On the other hand, the value of urban green space for experience of  
65 nature, improved health and well-being of urban residents is well documented  
66 [4,5,6,7,8,9]. Initiatives for urban green infrastructure seek to mitigate these trends.  
67 Examples include the city wall circular greenway in Nanjing [10], the Ring Boulevard  
68 in Vienna [11,12], and the Green Belt Berlin established on the former Berlin Wall  
69 [13]. Beside carbon storage and sequestration, these elements of green infrastructure  
70 provide ecosystem services such as microclimate regulation, improved air quality,  
71 water flow regulation, as well as habitat, food and shelter for plants and animals and  
72 thereby increase urban biodiversity [14,15]. Certain elements of green infrastructure,  
73 such as greenways, also contribute to the connectivity of otherwise isolated urban  
74 habitats [16,17,18,19,20].

75 Besides larger public green spaces such as parks, urban forests and greenways,  
76 domestic urban gardens in aggregate constitute a considerable share of the overall  
77 urban area. Depending on the city this constitutes a significant part of the overall  
78 green space: estimates for the UK varied from 35% for Edinburgh to 47% in Leicester  
79 [21], while private patios made up 86% of green area in León, Nicaragua [22] as seen  
80 in Goddard et al. ([15]). In the light of the dramatic biodiversity crisis, habitat

81 provided by public and private urban green space has an increased importance in  
82 supporting populations of animal and plant species [23]. For example urban green  
83 space could play an important role in mitigating insect declines [24,25,26].

84 In contrast to larger areas of public green space (e.g. parks), areas with gardens  
85 (domestic or community gardens) constitute a heterogeneous small-grained mosaic of  
86 diverse habitats influenced by different user management practices and individual  
87 preferences [27,28]. Because of the availability of flowers, several studies on  
88 pollinators have been conducted in community gardens, allotment gardens or  
89 domestic gardens (e.g. [29,30,31]). In contrast, the biodiversity of ground-dwelling  
90 invertebrates of domestic urban gardens has received little attention in domestic  
91 gardens, perhaps due to the dispersed ownership [27] and the assumption that only a  
92 reduced biodiversity can be recorded in these heavily managed parcels with many  
93 alien plants [32]. However, the few published studies surveying the ground-dwelling  
94 invertebrate biodiversity of urban domestic and community gardens, reported  
95 considerable numbers of individuals and species in various invertebrate groups if data  
96 of multiple gardens were combined (e.g. [33] in London, [34] in Sheffield, and [35] in  
97 Toledo, Ohio, USA). For many flying invertebrates (e.g. butterflies, hoverflies and  
98 wild bees), a single garden may constitute only a part of their home range because  
99 they only provide a part of the resources needed by the species. For these mobile  
100 species neighbouring gardens and the further surroundings are essential. In contrast,  
101 less mobile small invertebrates may complete their entire life cycle within a garden.  
102 This is prevalent among ground-dwelling invertebrates such as gastropods, spiders,  
103 woodlice, millipedes, ants and some groups of beetles with predominantly wingless  
104 species. These taxonomical groups play important roles in ecosystems functioning  
105 such as decomposing: gastropods, woodlice and millipedes; soil improvement and

106 seed dispersal: ants; predation: spiders, ants, ground beetles and rove beetles  
107 [36,37,38,39,40,41,42]. However, these groups are often overlooked and not actively  
108 promoted or intentionally transported by the garden owners [12].

109 Biodiversity assessments are frequently based on just one or two conspicuous  
110 charismatic groups whose response is assumed to reflect the diversity of other groups  
111 [43]. This approach is based on the assumption that species richness of various  
112 taxonomical groups are intercorrelated in a habitat; an assumption that is frequently  
113 not tested. In contrast, a multi-taxon approach provides both a more comprehensive  
114 assessment of the overall biodiversity and an estimate for the phylogenetic diversity  
115 and offers the opportunity to disentangle group-specific responses [44]. However,  
116 such an approach has rarely been used in urban environments (for exceptions see  
117 [45]).

118 In our study, we aimed at analysing the impacts of urbanisation and garden size on  
119 the diversity of seven groups of ground-dwelling invertebrates in the city of Basel and  
120 its surroundings (Switzerland). We also aimed to identify how landscape and local  
121 garden characteristics drive shifts in species composition. In contrast to some studies  
122 that consider different habitat types along the gradient, we focused on domestic  
123 gardens and thus considered the same habitat type from the rural surrounding to the  
124 city centre. Taken together, a sample of private domestic urban gardens represents a  
125 wide range of habitat types, with various degrees of management intensity and a huge  
126 range of naturalness. Thus, a sample of private domestic urban gardens offers niches  
127 for numerous species with very different requirements. For example Smith et al. [33]  
128 showed that just 11 sites in shared private domestic gardens or similar habitats in  
129 parks in London harboured a large share of the overall diversity in the UK for several  
130 invertebrate groups. Thus, we hypothesise that (1) our sample of 35 private domestic

131 gardens in combination harbours a considerable share of the species richness in the  
132 examined groups of ground-dwelling invertebrates compared to those recorded in  
133 Switzerland as a whole.

134 The heat island effect, input of pollutants and disturbance by light and noise all  
135 increased with increasing density of buildings in the city, and they may reduce the  
136 habitat suitability for certain species [3,19,46]. Furthermore, active dispersal may be  
137 reduced by the increasing distance to the source populations and the low permeability  
138 of the increasingly sealed urban environment [47]. Therefore, we hypothesise that (2)  
139 species richness of ground-dwelling invertebrates decreases and species composition  
140 changes with increasing degree of urbanisation, but different taxonomical groups  
141 respond differently to urbanisation because they may have differential sensitivity to  
142 increased heat, pollution load and other disturbances.

143 According to the species-area relationship [48], species richness is expected to  
144 depend on garden size even in cities [19]. However, this effect may be overlaid by the  
145 impact of urbanisation. We thus hypothesise, that (3) ground-dwelling invertebrate  
146 species richness increases with increasing garden size. High habitat and structural  
147 diversity as well as a diverse native vegetation provide more habitat niches and more  
148 varied food resources and in this way increase ground-dwelling invertebrate species  
149 richness [34, 49]. We therefore hypothesise that (4) local garden characteristics, such  
150 as habitat diversity and structural diversity, increase the richness and alter the  
151 composition of ground-dwelling invertebrates, with different garden characteristics  
152 affecting different taxonomical groups to a different extent.

153

## 154 **Material and methods**

### 155 **Garden selection**

156 The study was conducted in the city of Basel, its suburbs and nearby villages in  
157 North-western Switzerland (47° 34' N, 7° 36' E). Total annual precipitation averages  
158 842 mm and annual mean temperature is 10.5 °C in the city (records from 1981 to  
159 2010, [www.meteoswiss.admin.ch](http://www.meteoswiss.admin.ch)). Gardens were selected from a pool of 65  
160 candidates offered in response to public calls at a local conference, a municipal  
161 newspaper and a newsletter, as well as through personal contacts of the authors. After  
162 having visited all gardens in spring 2018, we chose 35 gardens that reflected a rural-  
163 urban gradient and represented both a range of garden  types and different management  
164 types (little to intensively managed) spread along the urbanisation gradient. Further  
165 criteria for the garden choice were acceptance of the intended sampling methods by  
166 the garden owners and guaranteed daytime access to the gardens. All gardens had a  
167 grassland area of at least 4 m<sup>2</sup>, allowing us to set up traps and hay baits (a further  
168 criterion for selection), but they differed in the composition of other habitat types (see  
169 below). .

170 The study focused on invertebrate species richness, species composition and  
171 abundance of sites in a widespread man-made habitat type, namely domestic gardens.  
172 We also recorded data on local and landscape-scale environmental characteristics as  
173 explanatory variables. However, we did not collect any personal data on garden  
174 owners. We do not present any data that could lead to the identification of single  
175 gardens or their owners. Therefore, no ethics review is required.

176

## 177 **Garden and landscape characteristics**

178 We assessed 13 local garden characteristics: total garden area, area with vegetation,  
179 grassland area, percentage of grassland, area of shrubs and trees, percentage shrub and  
180 tree cover, habitat richness, structural diversity, total native plant species richness,

181 native plant species richness in grassland, length of non-permeable garden border,  
 182 percentage length of non-permeable garden border, index of permeable garden border  
 183 (Table 1). As landscape characteristics we determined: percentage of sealed area and  
 184 percentage of green area, both within a radius of 200 m, and distance to the city centre  
 185 (Table 1).

186

187 **Table 1. Definitions of local garden and landscape characteristics and**  
 188 **transformation of data in the analyses and transformations used in correlation**  
 189 **and regression analyses.**

|                                 | Unit           | Transformation for correlations and regressions <sup>1</sup>                                                                                               | Description                                                                                         |
|---------------------------------|----------------|------------------------------------------------------------------------------------------------------------------------------------------------------------|-----------------------------------------------------------------------------------------------------|
| <b>Garden size</b>              |                |                                                                                                                                                            |                                                                                                     |
| Total garden area               | m <sup>2</sup> | log                                                                                                                                                        | Total garden area excluding buildings                                                               |
| Area with vegetation            | m <sup>2</sup> | sqrt when used as continuous variable, otherwise 3 classes: small (< 100 m <sup>2</sup> ), medium (100–400 m <sup>2</sup> ), large (> 400 m <sup>2</sup> ) | Area covered by any type of vegetation, including semi-sealed areas                                 |
| Grassland area                  | m <sup>2</sup> | log                                                                                                                                                        | Total area covered by any type of grassland (meadow, lawn, etc.)                                    |
| Percentage of grassland         | %              | arcsine                                                                                                                                                    | Percentage of grassland area of the area with vegetation                                            |
| Area of shrubs and trees        | m <sup>2</sup> | sqrt                                                                                                                                                       | Total area covered by shrubs and trees (canopy cover)                                               |
| Percentage shrub and tree cover | %              | non-parametric analyses                                                                                                                                    | Percentage of area covered by shrubs and trees of the area with vegetation                          |
| <b>Garden habitat diversity</b> |                |                                                                                                                                                            |                                                                                                     |
| Habitat richness                | count          | non-parametric analyses <sup>2</sup>                                                                                                                       | Summed occurrence of nine defined habitat features (see main text)                                  |
| Structural diversity            | Shannon index  | non-parametric analyses <sup>2</sup>                                                                                                                       | Shannon diversity of height of trees and shrubs, and plants in grassland, flower and vegetable beds |
| <b>Naturalness</b>              |                |                                                                                                                                                            |                                                                                                     |
| Total native plant              | count          | log <sup>2</sup>                                                                                                                                           | Number of native plant species in the area                                                          |

|                                                                                                    |       |                                                                                                                                         |                                                                                                                                              |
|----------------------------------------------------------------------------------------------------|-------|-----------------------------------------------------------------------------------------------------------------------------------------|----------------------------------------------------------------------------------------------------------------------------------------------|
| species richness  |       |                                                                                                                                         | with vegetation                                                                                                                              |
| Native plant species richness in grassland                                                         | count | log                                                                                                                                     | Number of native plant species in the grassland area                                                                                         |
| <b>Isolation of gardens</b>                                                                        |       |                                                                                                                                         |                                                                                                                                              |
| Length of non-permeable garden border                                                              | m     | sqrt                                                                                                                                    | Total length of non-permeable garden border (wall height > 30 cm from the outside) including buildings                                       |
| Percentage length of non-permeable garden border                                                   | %     | not transformed                                                                                                                         | Percentage of non-permeable garden border length of the total garden border length                                                           |
| Index of permeable garden border                                                                   | %     | not transformed                                                                                                                         | Index combining weighted length of permeable and semi-permeable garden border expressed as percentage of total border length (see main text) |
| <b>Landscape characteristics</b>                                                                   |       |                                                                                                                                         |                                                                                                                                              |
| Percentage of sealed area                                                                          | %     | log when used as continuous variable otherwise 3 classes: low (< 40%), medium (40–60.3 m <sup>2</sup> ), large (> 60.3 m <sup>2</sup> ) | Percentage of sealed area in a radius of 200 m around the garden                                                                             |
| Percentage of green area                                                                           | %     | arcsine                                                                                                                                 | Percentage of green area in a radius of 200 m around the garden                                                                              |
| Distance to city centre                                                                            | m     | log when used as continuous variable, otherwise 3 classes: short (< 1.5 km), medium (1.5–4 km), long (> 4 km)                           | Distance from the garden to the town hall of Basel city                                                                                      |

190

191

192

193

194

1 Some variables were transformed before being used in Pearson correlation analyses. Log-transformation, square-root-transformation and arcsine-transformations were tried where appropriate. In cases where variables were significantly non-normally distributed even after transformation, we used non-parametric Spearman correlations instead.

195

196

197

2 For local garden characteristics, which were correlated with garden size, we used the residuals of the relationship variable – total garden area when testing for inter-correlations among variables and when including them in GLM models.

198

199

Total garden area was retrieved from the databases Geoportal BS

200

<map.geo.bs.ch>, GeoView BL <geoview.bl.ch> and WebGIS Kanton Solothurn

201 <geo.so.ch/map>; all accessed on 28 March 2019. Using a tape we measured the area  
202 of the following features in each garden: grassland (all types of lawn and meadow  
203 combined), tree cover, shrub cover, flower bed, vegetable bed, semi-sealed area,  
204 sealed area, and a category of mixed herbaceous vegetation (Table 1). Semi-sealed  
205 area included gravel and cobblestone areas, and areas with flagstones. Single  
206 flagstones were included here when larger than 0.5 m<sup>2</sup>. As a surrogate for habitat  
207 richness, we recorded the occurrence of each of the following nine land cover types in  
208 each garden: grassland (any type), tree, shrub, hedge, flower bed, vegetable bed,  
209 compost heap or bin, dead wood (including fire wood, stumps and branches > 3 cm  
210 diameters when of a combined length of at least 3 m), and a combined category for  
211 other structures (e.g. pile of stones, pond, nest box, bird feeder, insect hotel). We  
212 awarded one point to each of the features present resulting in a potential habitat  
213 richness ranging from 1–9.

214 As a measure of structural diversity of a garden, we calculated the Shannon  
215 diversity index for the height of all categories of plants. We measured the height of all  
216 shrubs and estimated the height of the trees (accuracy: 1 m) using a measuring pole.  
217 The height of plants in the grassland area and in flower and vegetable beds was  
218 measured along a transect line for each habitat type separately. Transect lines ran  
219 along the long axis of the garden features. We considered plants at intervals of 2 m  
220 along the transect line. Sampling effort was thus proportional to the area with  
221 vegetation. Structural diversity was assessed in all gardens between 24 July and 20  
222 August 2018.

223 We considered the number of native plant species as a surrogate of the naturalness  
224 of a garden. We used two measures: native plant species richness found in the  
225 grassland and total native plant species richness per garden. We recorded all native



226 species (including woody species) occurring in the grassland by slowly walking in a  
227 zigzag line over the grassland area of a garden. Thus, for this variable, sampling effort  
228 was proportional to the size of the grassland area in a garden. For total native plant  
229 species richness, native plant species richness in grassland was complemented by  
230 recording the native plant species in the other habitat types by slowly walking along  
231 the transect lines described above for structural diversity.

232 We considered isolation of gardens by assessing the permeability of their borders  
233 to immigration by ground-dwelling invertebrates. For each garden, we measured the  
234 total length of non-permeable garden border. We considered a border as non-  
235 permeable when invertebrate immigrants were blocked by a building or a wall with a  
236 height from the outside  $> 30$  cm. However, migration by ground-dwelling  
237 invertebrates may also be reduced by fences or other semi-permeable borders  
238 structures. As semi-permeable features we considered walls 10–30 cm in height from  
239 the outside and fences with gaps  $< 3$  cm. Thus, permeable borders were defined as  
240 total border length minus non-permeable border and semi-permeable border. We  
241 calculated an index combining weighted permeable borders and semi-permeable  
242 borders by adding the length of the permeable garden border to the halved length of  
243 the semi-permeable garden border and expressing it as percentage of the total garden  
244 border length (Table 1).

245 We used three landscape characteristics as surrogates for the degree of  
246 urbanisation: percentage sealed area, percentage green area, and distance to city  
247 centre. A commonly used measure for degree of urbanisation is the percentage of  
248 sealed area (e.g. [3,50,51]). We determined the percentages of both sealed and green  
249 area within a radius of 200 m around the centre of each garden. We derived land  
250 cover data from satellite images (Google Earth, 2009). We then determined the

251 percentage cover of sealed area (built-up area and traffic infrastructure including  
252 semi-sealed areas), and green area (urban green space comprising gardens, parks and  
253 allotments etc., areas covered by tree canopies, as well as agricultural land and forest  
254 cover) using the pixel counting function of Adobe Photoshop Elements (2019).  
255 Finally, we measured the distance of each garden to the city centre represented by the  
256 town hall of Basel city.

257

### 258 **Invertebrate surveys**

259 For the biodiversity assessment we considered seven groups of ground-dwelling  
260 invertebrates. The groups cover a wide range of feeding strategies and included  
261 phylogenetically distant taxa: Gastropoda (snails and slugs), Araneae (spiders),  
262 Diplopoda (millipedes), Isopoda (woodlice), Formicidae (ants), Carabidae (ground  
263 beetles), and Staphylinidae (rove beetles) excluding the subfamily Pselaphinae. We  
264 used pitfall traps and hay bait traps to sample all groups. Additional techniques were  
265 employed for three groups (Gastropoda, Diplopoda and Formicidae; see below).  
266 Sampling was performed between 31 May and 18 October 2018.

267 Pitfall traps consisted of plastic cups (5.8 cm diameter) partially filled with a  
268 saturated salt solution with detergent added to break the surface tension. We chose  
269 this non-toxic preservative because children, domestic animals and other small  
270 mammals frequently visited gardens. A rain shelter consisting of a 17 cm x 17 cm  
271 plastic square 3 cm above ground protected traps also from interference by larger  
272 animals. We placed five pitfall traps in the grassland of each garden. Traps were  
273 placed random  However, if a garden had more than one distinct area with grassland  
274 then traps were assigned to each proportionally, but placed in random locations within  
275 each area. To account for seasonal differences in invertebrate activity, traps were

276 operated for one week each in early summer, late summer, and autumn. We  
277 randomised the order in which gardens were sampled during each period.

278 We used hay bait traps to target detritivores and their predators. This method has  
279 been recommended for millipedes and centipedes [52], but may also work for other  
280 ground-dwelling invertebrate groups. A trap consisted of a 25 cm x 25 cm pocket of  
281 plastic net with a mesh size of 2 cm filled with wet hay. We placed five hay bait traps  
282 in the grassland of each garden in such a way that the wet hay was in contact with the  
283 upper soil layer. Hay bait traps were installed at the same times as the pitfall traps and  
284 distributed following the same procedure. Upon recovery, we transported the baits in  
285 individual plastic bags to the laboratory, and placed the hay in Berlese funnels for 10  
286 days. Specimens from both trap types were transferred to 70% ethanol for further  
287 species determination. 

288 Using both trapping methods, we obtained a total of 3,099 spider individuals  
289 (pitfalls: 2,803 individuals, 90.4% of individuals; hay baits: 296 individuals, 9.6%).  
290 Furthermore, we obtained a total of 13,913 woodlice individuals (pitfalls: 7,484  
291 individuals, 53.8%; hay baits: 6,429 individuals, 46.2%). Both trapping methods  
292 revealed a total of 49 ground beetle individuals (pitfalls: 43 individuals, 87.8%; hay  
293 baits: 6 individuals, 12.2%) and 1279 rove beetle individuals (pitfalls: 175  
294 individuals, 13.1%; hay baits: 1,104 individuals, 86.9%). These taxa were identified  
295 to species level using standard identification keys: spiders [53,54,55,56]; woodlice  
296 [57,58]; ground beetles [59]; rove beetles [60,61,62,63,65,66]. Nomenclature  
297 followed World Spider Catalog [67] for spiders, Hopkin [58] for woodlice, Müller-  
298 Motzfeld [59] for ground beetles and Schülke & Smetana [68] for rove beetles.  
299 Captures for gastropods, millipedes and ants are listed below together with records  
300 made by other methods employed for these groups.

301 We applied four methods to assess the species richness and relative abundance of  
302 terrestrial gastropods in each garden [69]. First, we visually searched for living snails  
303 and slugs and for empty shells on the ground, in the leaf litter, and under dead wood  
304 and stones in each garden for a total of 90 min. Second, we collected soil samples  
305 including dead plant material (up to 2 cm depth, in total a volume of 1 litre per  
306 garden) at 4–6 randomly chosen spots in each garden. For the extraction of snails, soil  
307 samples were sieved (mesh sizes 5 and 2 mm) and later examined using a binocular  
308 microscope. The combination of the two methods allows detection of both large-sized  
309 taxa that often occur at low density and micro-species that are cryptic and litter-  
310 dwelling [70]. Sampling was complemented by the individuals caught in the pitfall  
311 and hay traps (see above). The latter methods mainly attracted slugs, which were  
312 underrepresented when only the first two methods were applied. Identification of  
313 gastropods followed Kerney et al. [71], and the nomenclature of Turner et al. [72] was  
314 applied. We determined a total of 3,427 gastropod individuals to the species level  
315 (visual search and soil samples: 1,716 individuals, 50.1%; pitfalls: 1,280 individuals,  
316 37.4%; hay baits: 431 individuals, 12.6%).

317 To examine species richness and abundance of millipedes, we visually searched  
318 for millipedes 30 min in each garden and season (in total 90 min per garden). We  
319 considered all habitat types but directed special attention to microhabitats preferred by  
320 millipedes, such as compost heaps, leaf litter layer, and the underside of pieces of  
321 stone and pots. We sampled a total of 6,888 individuals (visual search: 6,052  
322 individuals, 87.9%; pitfalls 70 individuals, 1.0%; hay baits: 766 individuals, 11.1%).  
323 Individuals were identified to species level by comparing the external and gonopod  
324 morphology with either the original descriptions, or the keys and descriptions present  
325 in Blower [73] of the species reported in Switzerland and surrounding countries by

326 Pedroli-Christen [74], and Kime & Enghoff [75,76]. The nomenclature followed  
327 Kime & Enghoff [75,76]. In a few cases, determination of juveniles or females was  
328 only possible at genus or family level (42 individuals, 0.6% of total individuals).

329 Pitfall traps were the main method to capture ants (9,326 ants; 71.5%), followed  
330 by hay baits (3,717 ants; 28.5%), which were very attractive to some ant species  
331 (especially *Solenopsis fugax*, *Myrmecina graminicola* and *Tetramorium cf.*  
332 *caespitum*). The species list was complemented by an active search of 15 min during  
333 each season (total: 45 min per garden). The search prioritised microhabitats and  
334 species not sufficiently sampled with the traps, such as mainly arboreal or  
335 subterranean species. Only voucher specimens were collected from large aggregations  
336 such as nests or trails. In total 966 ants were collected during the active search. We  
337 identified ants to species level. The key of Seifert [77] was used and nomenclature  
338 updated according to recent taxonomic revisions following ([www.antweb.org](http://www.antweb.org)).  
339 Because of the aggregated distribution of ant workers in these social insects, which  
340 are living in colonies, all analyses were performed using presence/absence data  
341 (abundance data were not considered in this group).

342

### 343 **Data analyses**

344 Statistical analyses were performed in R (ver. 3.3.3 and ver. 3.6.1, [www.r-project.org](http://www.r-project.org))  
345 and were carried out separately for the different taxonomical groups with the 35  
346 gardens as replicates. We used observed species richness (hereafter species richness)  
347 as a surrogate for total species richness (some gardens harboured only one or two  
348 individuals of a taxonomical group rendering rarefaction methods inadequate).  
349 However, juvenile spiders could only be identified at family level. In some gardens  
350 we recorded juveniles from families not represented by adults. In these cases we also

351 calculated supplemented species richness by adding one species for each such family.  
352 Juvenile woodlice were not identified. Thus, species richness of woodlice is only  
353 based on adults.

354 We used Pearson's correlation to examine whether species richness of various  
355 groups were inter-correlated. Similarly, we tested whether the local garden  
356 characteristics and landscape factors assessed were inter-correlated using Pearson's  
357 correlation. However, for variables, which were not normally distributed even after  
358 transformation, we used Spearman rank correlations instead (Table 1, S1 Table).

359 Based on the percentage cover of sealed area in their surroundings, we classified  
360 the gardens into areas with low ( $< 40\%$ ), medium ( $40\text{--}60.3\%$ ) or high ( $> 60.3\%$ )  
361 degrees of urbanisation. We also assigned gardens into distance classes depending on  
362 their distance to the city centre: short ( $< 1.5$  km), medium ( $1.5\text{--}4$  km), or long ( $> 4$   
363 km) (Table 1). Similarly, we assigned gardens to three size classes based on the area  
364 with vegetation: small ( $< 100$  m<sup>2</sup>), medium ( $100\text{--}400$  m<sup>2</sup>) and large ( $> 400$  m<sup>2</sup>). For  
365 analyses, we considered landscape characteristics and garden size either as factors  
366 (first approach) or as continuous variables (second approach) to examine the potential  
367 effects on species richness and abundance. In each model we included only one  
368 landscape factor, either distance to city centre or percentage sealed area, because these  
369 two factors were not independent.

370 We applied generalised linear models (GLM) with quasi-Poisson distributed  
371 errors (previous analyses revealed overdispersion when Poisson error distribution  
372 were used) and log-link function to examine potential effects of landscape  
373 characteristics, garden size, their interaction, and various local garden characteristics  
374 on species richness of different taxonomical groups. In the second approach, the same  
375 model was applied but with continuous variables for landscape characteristics and

376 garden size and without their interaction. The two main factors landscape (distance to  
377 city centre or percentage sealed area) and garden size were retained in all models,  
378 while a step-wise procedure was followed to obtain the minimal adequate models  
379 [78]. As further explanatory variables we originally considered all variables listed in  
380 Table 1. However, due to collinearity, we omitted several variables, retaining only  
381 one from each group of related variables: total native plant species richness, habitat  
382 richness, structural diversity and index of permeable border. The first three variables  
383 were correlated with garden size. Therefore, we used residuals of the relationships  
384 between the variable and total garden area for the GLM models.

385 As abundance, we considered the total number of individuals captured for each  
386 taxonomical group using all collection methods combined. In spiders and woodlice,  
387 we calculated abundance for both adult specimens and for all specimens including  
388 unidentified juveniles. We did not consider ant abundance because of the aggregated  
389 nature of ant colonies. Analogous to the analyses for species richness, we used GLM  
390 models with the same main factors and explanatory variables (quasi-Poisson  
391 distributed errors and log-link function; previous analyses revealed overdispersion  
392 when using Poisson error distribution). Stepwise reduction of models was done as  
393 described above for species richness.

394 To examine whether local garden characteristics influence the composition of  
395 invertebrate communities at the garden level we applied the permutational  
396 multivariate analysis of variance (PERMANOVA using the *adonis* function in the  
397 *vegan* package, <https://cran.r-project.org/web/packages/vegan/index.html>; [79]) with  
398 matrices based on Sørensen distances. We used constrained analysis of principal  
399 coordinates [80] based on community data to assess whether the composition of  
400 various invertebrate communities differed among distance-to-the-city-centre classes.

401 We ran ANOVA-like permutations to test for a significant separation of distance  
402 classes in a multivariate space. The same approach was followed for sealed area  
403 classes. We did not consider ground beetles in this analysis because individuals of this  
404 group were only recorded in ten gardens. We ran this analysis twice. First, we used  
405 data of all species recorded, and second, we used a data set without singletons. Within  
406 invertebrate groups, both analyses revealed very similar results (except for rove  
407 beetles). We therefore present only the results based on all species (in rove beetles we  
408 present both analyses).

409 We used the Sørensen similarity index to assess the similarities in species  
410 composition among all gardens. We calculated the Sørensen-index for all  
411 combinations of each two gardens (595 combinations) for each invertebrate group. To  
412 examine the potential effect of landscape characteristics on the similarity in species  
413 composition, we assigned the 35 gardens into three distance classes according to their  
414 distance to the city centre (see above) and calculated the Sørensen-index for all  
415 combinations of each two gardens belonging to the same distance class.

416

## 417 **Results**

### 418 **Garden characteristics**

419 The 35 gardens examined ranged in size from 61–1,379 m<sup>2</sup> (mean: 479.5 m<sup>2</sup>; S2  
420 Table, S3 Table). On average 86% of the total garden area was covered by vegetation  
421 (mean: 412.1 m<sup>2</sup>; range: 28.8–1,276.9 m<sup>2</sup>). Grassland was the dominant vegetation  
422 type with 37.1% of the vegetated area (mean grassland area: 165.6 m<sup>2</sup>; range: 4.0–  
423 752.3 m<sup>2</sup>). Habitat richness ranged from 4–9, the maximum possible, with a mean of  
424 7.7, indicating overall rich habitat diversity in the studied gardens. Structural diversity



425 of gardens ranged from 2.6 to 4.4 (Shannon index; mean: 3.7). As proxies of garden  
426 naturalness, we assessed total native plant species of entire gardens and the native  
427 plant richness of the grassland area. Total native plant species richness ranged from  
428 14 to 128 (mean: 57.2) and native plant species richness in grassland ranged from 8 to  
429 80 (mean: 32.1).

430 Most gardens had a large proportion of permeable and semi-permeable borders  
431 (S2 Table, S3 Table), indicated by the index of permeable garden border (mean:  
432 59.8%; range: 4.4–100.0%). Degree of urbanisation expressed as percentage of sealed  
433 area (including semi-sealed) within a radius of 200 m around each garden ranged  
434 from 32.8% to 87.0% (mean: 52.9%). Distance to the city centre, ranged from 556 m  
435 to 9,516 m (mean: 3,307 m). As a proxy for colonisation probability and landscape  
436 connectivity, we considered the percentage of green area within a radius of 200 m,  
437 which ranged from 6.8% to 67.2% (mean: 45.4%).

438 Various garden characteristics were positively correlated with total garden area.  
439 Larger gardens had a larger area with vegetation ( $r = 0.98$ ,  $P < 0.0001$ ;  $n = 35$  in this  
440 and following correlations), more area covered by grassland ( $r = 0.86$ ,  $P < 0.0001$ ),  
441 more area covered by shrubs and trees ( $r = 0.71$ ,  $P < 0.0001$ ), a higher habitat richness  
442 ( $r_s = 0.47$ ,  $P = 0.0043$ ) and higher structural diversity ( $r_s = 0.70$ ,  $P < 0.0001$ ), as well  
443 as a higher plant species richness both in the grassland ( $r = 0.58$ ,  $P = 0.0002$ ) and  
444 overall ( $r = 0.56$ ,  $P = 0.0005$ ). However, independent of garden size, the proportion of  
445 grassland area and area covered by shrubs and trees remained stable (grassland:  $r =$   
446  $0.18$ ,  $P = 0.30$ ; shrubs and trees:  $r_s = 0.31$ ,  $P = 0.0682$ ). Similarly, the permeability of  
447 the borders was not correlated with the total area of the corresponding garden (index  
448 of permeability:  $r = 0.16$ ,  $P = 0.37$ ).

449 Total garden area and distance to the city centre were not correlated ( $r_s = 0.06$ ,  $P =$   
450  $0.71$ ). This was mainly due to the fact that we selected both large and small gardens at  
451 any distance to the city centre for this study. In contrast, gardens were on average  
452 larger in less urbanised areas as shown by the positive correlation of total garden area  
453 with the percentage of green area in the surroundings ( $r = 0.46$ ,  $P = 0.0058$ ), and  
454 correspondingly, by the negative correlation with percentage of sealed area ( $r = -0.35$ ,  
455  $P = 0.0368$ ).

456

### 457 **Invertebrate species richness and abundance**

458 In the 35 gardens investigated we recorded overall 39 gastropod species, 52 spider  
459 species, 22 millipede species, 10 woodlice species, 29 ant species, 26 ground beetle  
460 species and 87 rove beetle species (Table 2). The gardens examined harbour an  
461 astonishing share of the of species richness of the corresponding groups known for  
462 Switzerland (gastropods 19.5% [81], spiders 5.9% ([www.cscf.ch](http://www.cscf.ch); accessed 12 Nov  
463 2019), millipedes 16.7% [74,82], woodlice 23.3% of non-aquatic isopod species (cscf;  
464 communication by Yves Gonseth), ants 20.9% [83], ground beetles 4.7%  
465 ([www.cscf.ch](http://www.cscf.ch); accessed 12 Nov 2019), and rove beetles 6.2% [84].

466

467 **Table 2. Species richness per garden (n = 35). Percentages refer to the share of species of a group found in single gardens in relation to the total**  
 468 **number of species recorded. Supplemented species richness is given in italics.**

| Taxonomic group                   | Species richness |                   |                |                      |                     |                                | Relative abundance <sup>6</sup> |                 |
|-----------------------------------|------------------|-------------------|----------------|----------------------|---------------------|--------------------------------|---------------------------------|-----------------|
|                                   | Total            | Mean ± SD         | Range          | Mean percentage ± SD | Range of percentage | Chao 1 (Chao 2)<br>All gardens | Mean ± SD                       | Range           |
| Gastropods                        | 39               | 10.5 ± 4.0        | 5 – 21         | 26.8 ± 10.2          | 12.8 – 53.9         | 50.7 (61.1)                    | 97.9 ± 56.2                     | 29 – 267        |
| Spiders                           | 52               | 9.3 ± 2.8         | 4 – 18         | 17.2 ± 5.2           | 7.4 – 33.3          | 58.1 (66.2)                    | 30.8 ± 14.5                     | 11 – 80         |
| <i>Spiders suppl.<sup>1</sup></i> | <i>55</i>        | <i>11.6 ± 3.0</i> | <i>6 – 20</i>  | <i>20.4 ± 5.3</i>    | <i>10.5 – 35.1</i>  | <i>NA (NA)</i>                 | <i>88.8 ± 45.3</i>              | <i>27 – 190</i> |
| Millipedes                        | 22               | 5.6 ± 2.3         | 2 – 13         | 25.3 ± 10.7          | 9.1 – 59.1          | 22.0 (22.0)                    | 196.6 ± 177.4                   | 16 – 650        |
| Woodlice <sup>2</sup>             | 10               | 4.1 ± 1.7         | 1 – 8          | 40.6 ± 17.1          | 10.0 – 80.0         | 10.0 (10.0)                    | 398.1 ± 811.1                   | 1 – 1884        |
| Ants <sup>3</sup>                 | 29               | 7.9 ± 2.2         | 4 – 13         | 27.4 ± 7.5           | 13.8 – 44.8         | NA (44)                        | NA                              | NA              |
| Ground beetles                    | 26               | 0.9 ± 1.3         | 0 – 5          | 3.3 ± 5.0            | 0.0 – 19.2          | 204.5 (244.5)                  | 1.1 ± 1.9                       | 0 – 8           |
| Rove beetles                      | 87               | 10.7 ± 5.2        | 5 – 25         | 12.3 ± 5.9           | 5.7 – 28.7          | 119.7 (138.0)                  | 36.4 ± 50.8                     | 8 – 275         |
| Total <sup>4</sup>                | 265              | 47.5 ± 9.4        | 34 – 66        | 18.3 ± 3.6           | 13.1 – 25.4         | 346.0 (384.9)                  | 1133.3 ± 976.9                  | 400 – 4928      |
| <i>Total suppl.<sup>5</sup></i>   | <i>268</i>       | <i>51.2 ± 9.6</i> | <i>37 – 73</i> | <i>19.0 ± 3.5</i>    | <i>13.7 – 27.0</i>  | <i>NA (NA)</i>                 | <i>NA</i>                       | <i>NA</i>       |

469

470 1 Supplemented spider species richness includes added species for families only represented by juvenile spiders within a garden.

471 2 Based on adult specimens identified to species level. Including juveniles the relative abundance ranged from 1–4217 individuals.

- 472 3 Observed species richness of ants based on pitfall traps and hay baits supplemented by active search. As the latter was not quantitative, indices requiring  
473 measures of abundance could not be calculated (NA). For an overall estimate of supplemented ant species richness in all gardens we calculated the  
474 incidence-based Chao2 estimator.
- 475 4 Total species richness is based on identified adult specimens of all groups.
- 476 5 Supplemented total species richness includes added species for families only represented by juvenile spiders in a garden.
- 477 6 All gardens were sampled with standardised procedures independent of garden size. Relative abundance is therefore a proxy for the variation in density of  
478 different taxonomic groups among gardens.

479 Species richness varied among gardens (Table 2). Depending on species group,  
480 the gardens with the highest diversity harboured 2–8 times more species than the  
481 gardens with the least species (Table 2). Interestingly, a particular garden could  
482 contain a large share of the overall number of species recorded in one or a few  
483 taxonomical groups but a poor share in other species groups. For example, the garden  
484 with the most invertebrate species overall also had the most woodlice species of all  
485 gardens and was among the most species-rich gardens when considering gastropods,  
486 ants or beetles. However, the same garden was only ranked eleventh out of 35 for  
487 spiders and came last for millipedes (S4 Table, S5 Table). In relation to the species  
488 pool of our 35 gardens, a single garden had on average 18.3% of the total number of  
489 species recorded in our study (range: 3.3% of all ground beetle species to 40.6% of all  
490 woodlice species; Table 2, S5 Table). Similarly to species richness, relative  
491 abundance of the studied taxonomical groups varied among gardens, with some  
492 groups relatively poorly represented in several gardens (Table 2, S6 Table).

493 The fact that the same garden had higher than average species richness for some  
494 taxonomical groups, but lower than average species richness for other groups, is  
495 mirrored by the lack of correlations among the species richness of most invertebrate  
496 groups, considering gardens as independent replicates (S1 Table). This indicates that  
497 single taxonomical groups are poor estimators of overall biodiversity in private  
498 domestic gardens.

499

## 500 **Effects of landscape and local garden characteristics on invertebrate** 501 **species richness**

502 We used two landscape factors, capturing different aspects of urbanisation. Distance  
503 to the city centre is related to the degree of isolation from larger semi-natural areas,

504 while percentage of sealed area within 200 m refers to the quality of the matrix  
505 surrounding a particular garden. Distance to city centre affected species richness in  
506 gastropods, spiders, millipedes, ants and rove beetles and tended to affect that of  
507 woodlice (Fig. 1; S7 Table). The shape of the relationship varied depending on the  
508 invertebrate group. While, spider and ant species richness increased with increasing  
509 distance from the city centre, the opposite was true for rove beetles (Fig. 1; S7 Table).  
510 Gastropod and millipede species richness were also lowest at long distance from the  
511 city centre but their richness was highest at medium distance from the city centre (Fig.  
512 1; S7 Table). Most landscape effects disappeared if the percentage of sealed area  
513 rather than distance to the city centre is used in the models, the exception being the  
514 high richness of rove beetles in gardens with a high percentage of sealed area in the  
515 surroundings (S7 Table).

516

517 Fig. 1. Effects of urbanisation (distance to city centre; three classes), garden size (area  
518 with vegetation; three classes) and local garden characteristics (Table 1) on the  
519 species richness of six groups of invertebrates. Plots show significant responses ( $P <$   
520  $0.05$ ) from GLMs (see Model 1 in S7 Table for more details). P-values for the  
521 response of the GLMs are shown. Displayed are deviance residuals for species  
522 richness from full models after stepwise reduction omitting the respective factor. This  
523 procedure corrected for other factors in the GLM. For native plant species richness,  
524 habitat richness and structural diversity, residuals from regressions of these factors on  
525 total garden area were used, because all three variables were correlated with garden  
526 size. Positive values in the bar plots indicate a higher than expected species richness.  
527 “–” indicates factors that were omitted from the models in the stepwise procedure.  
528 “ns” indicates factors that were retained in the model, but were not significant. For

529 each family only represented by juvenile spiders, which were not identified to species  
530 level, we added an extra species to the count for the category spiders supplemented.

531

532 In the models with distance to city centre, area with vegetation, a measure of  
533 garden size, had a positive effect on species richness of ants, and tended to influence  
534 species richness of spiders (Fig. 1; S7 Table; spiders: u-shaped; spiders supplemented:  
535 hump-shaped). In the models considering percentage of sealed area, area with  
536 vegetation positively affected the species richness of spiders and ants (S7 Table). No  
537 interactions between distance to city centre or percentage of sealed area with area  
538 with vegetation were found in any group (Fig. 1; S7 Table). Garden border  
539 permeability (index of permeable garden border), a component of garden isolation,  
540 did not affect species richness of any group (Fig. 1; S7 Table).

541 Characteristics reflecting the naturalness and diversity of the gardens (native plant  
542 species richness, habitat richness, structural diversity) affected species richness of  
543 different groups to a varying degree. Native plant species richness positively affected  
544 species richness of gastropods in models that considered distance to the city centre or  
545 percentage of sealed area as classes (Fig. 1; S7 Table). A similar positive effect of  
546 native plant species richness on species richness of ants was found for models with  
547 continuous variables for distance to the city centre and percentage sealed area. Both  
548 habitat richness and structural diversity only influenced gastropod richness. Habitat  
549 richness positively affected gastropod richness in the model with distance to city  
550 centre as classes (Fig. 1; S7 Table), while structural diversity was positively related to  
551 gastropod richness in models with distance to city centre or percentage of sealed area  
552 as continuous variables (S7 Table).

553

554 **Effects of landscape and local garden characteristics on invertebrate**  
555 **abundance**

556 Considering distance classes, distance to the city centre affected abundance of  
557 gastropods, spiders (incl. juveniles), woodlice (incl. juveniles) and rove beetles, but  
558 not that of millipedes (S7 Table). Considering distance to city centre as continuous  
559 variable, abundance of rove beetles was negatively influenced (S7 Table). Percentage  
560 of sealed area positively affected the abundance of rove beetles and spiders incl.  
561 juveniles (only models with classes), but not the abundance of the other groups (S7  
562 Table). In models with percentage of sealed area as classes, rove beetle abundance  
563 was highest in gardens with a small area with vegetation and lowest in gardens with a  
564 medium-sized area with vegetation. In models with distance to the city centre as a  
565 continuous variable, abundance of adult spiders was positively influenced by area  
566 with vegetation (S7 Table). In contrast, millipede abundance was negatively affected  
567 by the area with vegetation in models with either distance to the city centre or  
568 percentage of sealed area as continuous variables (S7 Table). Increased border  
569 permeability had a positive effect on millipede abundance in the model with distance  
570 to city centre as classes, but did not influence other taxonomical groups (S7 Table).  
571 Surprisingly, millipede abundance was negatively affected by native plant species  
572 richness in all models (S7 Table). Increased habitat richness positively affected rove  
573 beetle abundance in the model with distance to the city centre as classes, and spider  
574 inclusively juveniles abundance in the three other models (S7 Table).

575

576 **Effects of landscape and local garden characteristics on invertebrate**  
577 **species composition**



578 Principle coordinate analyses showed that gardens with different distances to the city  
579 centre (three classes) differed in species composition of millipedes, ants and rove  
580 beetles (Fig. 2c,e,f) and tended to differ in gastropods (Fig. 2a). Species composition  
581 of spiders and woodlice did not differ among gardens with different distance classes  
582 (Fig. 2b,d). Similar results were obtained when percentage of sealed area in the  
583 surroundings (three classes) was used in the analysis instead of distance to city centre  
584 (data not shown).

585

586 Fig. 2. Results of constrained analyses of principles coordinates visualizing  
587 similarities in species compositions of gastropods (a), spiders (b), millipedes (c),  
588 woodlice (d), ants (e), and rove beetles (f) in gardens located at different distances to  
589 the city centre (three classes; black refers to inner city gardens, dark grey to gardens at  
590 intermediate distance and light grey to gardens at long distance from the city centre).

591

592 PERMANOVAs revealed that structural diversity influenced the species  
593 composition of both gastropods ( $F_{1,34} = 2.48$ ,  $P = 0.022$ ) and spiders ( $F_{1,34} = 2.63$ ,  $P =$   
594  $0.008$ ) in the gardens. The species composition of millipedes was affected by the area  
595 with vegetation ( $F_{2,34} = 2.30$ ,  $P = 0.041$ ) and garden border permeability (index of  
596 permeable border:  $F_{1,34} = 2.85$ ,  $P = 0.040$ ). Similarly, ant species composition was  
597 influenced by the area with vegetation ( $F_{2,34} = 2.90$ ,  $P = 0.035$ ). In contrast, the  
598 species composition of woodlice and rove beetles were not affected by any local  
599 garden characteristics (in both cases  $P > 0.28$ ). However, when singletons were  
600 excluded from the data set, then garden border permeability influenced species  
601 composition in rove beetles (index of permeability:  $F_{1,34} = 3.04$ ,  $P = 0.023$ ).

602 The communities of the different invertebrate groups showed different  
603 distributions of similarity (contingency-test, 2136.6, d.f. = 45,  $P < 0.0001$ ; S1 Fig.).  
604 The average Sørensen similarity between two gardens ranged from 0.49 in ants, 0.54  
605 in woodlice, 0.57 in gastropods, 0.59 in millipedes, 0.75 in spiders to 0.82 in rove  
606 beetles. Distance to the city centre (three classes) influenced the similarity in species  
607 composition in the invertebrate groups examined to a different extent (S2 Fig.). The  
608 similarity in both the ant and rove beetle communities was lower in inner city gardens  
609 than in gardens at the periphery of the city (S2 Fig. e,f). In contrast, the similarity in  
610 gastropod communities was higher in inner city gardens than in gardens in the  
611 periphery of the city (S2 Fig. a). In spiders, millipedes and woodlice, the similarities  
612 of the communities were not affected by distance to city centre (S2 Fig. b,c,d). Similar  
613 results were obtained when percentage of sealed area in the surroundings (three  
614 classes) were used in the analysis instead of distance to city centre (data not shown).

615

## 616 **Discussion**

### 617 **Biodiversity of urban gardens in Basel**

618 Considered together, the 35 domestic gardens investigated in our study harboured a  
619 considerable share of the total Swiss species richness known for the corresponding  
620 groups (4.7–23.3%). This is impressive considering that the cumulated area of the 35  
621 gardens amounted to 0.44 ha, just 0.000035% of the area of Switzerland (the area  
622 over which the gardens are spread represents only 0.2% of the area of Switzerland).  
623 Our study supports earlier findings that a highly variable mosaic of different habitat  
624 types as presented by areas with domestic gardens, even though they are in most cases  
625 intensely managed, contains a significant part of a country's biodiversity [34]. Similar

626 shares of millipedes (17%), woodlice (24%) and ants (14%) have been reported in  
627 urban gardens of London as a percentage of the total species list for those groups  
628 across the whole of the British Isles [33].

629 The domestic gardens studied in Basel varied greatly in species richness.  
630 Unexpectedly, however, a particular garden harbouring a high proportion of the  
631 overall species richness recorded in one or a few taxonomical groups could have a  
632 poor proportion of the species richness recorded in other taxonomical groups. Thus,  
633 no garden was among the best suited for all invertebrate groups considered. This  
634 finding is a combined effect of several factors including: 1) certain gardens not  
635 fulfilling the special requirements of the species of some taxonomical groups, e.g.  
636 because of intensive management or application of certain pesticides; 2) interactions  
637 among species of different taxonomical groups (some of those groups not examined in  
638 the present study), e.g. competition for resources, predation as a controlling factor  
639 reducing abundance, and facilitation of some taxa through the presence of others  
640 (including species not examined).

641

### 642 **Importance of landscape characteristics**

643 We used the two landscape characteristics “distance to city centre” and “percentage of  
644 sealed area in the surroundings”, which were related to different aspects of  
645 urbanisation. In Basel, distance to city centre is a rough estimate for the proximity to  
646 natural and semi-natural areas. In contrast, percentage of sealed area mirrors the  
647 habitat matrix and thus inversely the percentage of green area in the proximity of a  
648 garden. In general, both landscape characteristics are inter-correlated, although  
649 significant deviations may occur as a result of decentralised secondary centres and  
650 industrialised areas. Both measures have been repeatedly used in studies of urban

651 biodiversity patterns (e.g. [30,85,86]). Indeed, as in other studies, distance to city  
652 centre and percentage of sealed area were inter-correlated in Basel.

653 In our study, distance to the city centre of the gardens investigated ranged from  
654 556 m to 9.5 km. The latter gardens were located in the rural surroundings, indicating  
655 that in an international context Basel is a small city (population of the city of Basel:  
656 177,784 at the end of 2019; [87]; greater Basel area including Germany and France:  
657 731,167; [88]). Considering percentage of sealed area, however, with a range of 32.8–  
658 87.0% in our study, this aspect of degree of urbanisation was comparable to that of  
659 much larger metropolises in Western Europe (Paris: 27.0–82.5% [89]; Sheffield, UK:  
660 21–72% [34]; Zurich: 2.5–91.8% [90]). Interestingly, however, we found significant  
661 effects on both species richness and abundance more often in models with distance to  
662 the city centre than in those with percentage sealed area, even though the maximum  
663 distance to potential source populations in the surrounding rural areas was  
664 comparatively short. This suggests that the gradient in degree of urbanisation in Basel  
665 is relatively steep in relation to the distance from rural habitats. Factors associated  
666 with the distance to the city centre may act as filters decreasing the chance of  
667 establishment of certain species in gardens located in the inner city [91].

668 In our study, species richness and/or species composition of most groups were  
669 affected by distance to the city centre. However, the direction of the response varied  
670 among invertebrate groups. This supports findings from other studies, as reported in  
671 the review by Gosling et al. [92], in which 63.8% of studies on invertebrates showed a  
672 decrease in species richness with urbanisation and only 29.8% an increase (6.4%  
673 found no effect). In this context it is important to note that our approach differs from  
674 some other studies on the effects of urbanisation on species richness. We considered  
675 the same habitat type (domestic gardens) from the rural surrounding to the city centre.

676 This contrasts with an alternative approach focusing on the urbanisation gradient by  
677 investigating plots occurring at given distances to the city centre. These plots may  
678 contain quite different habitat types (e.g. a nature preserve, recreational area, golf  
679 course, residential neighbourhood, office park and business district in Blair and  
680 Launer [93], and residential areas, golf courses and forest in Porter et al. [94]).  
681 Consequently, our gradient did not extent to natural or semi-natural habitats in rural  
682 areas, which may contain quite different species assemblages.

683 We found rather distinct species assemblages for gastropods, ants and rove beetles  
684 along the urbanisation gradient. Isolation of gardens in the inner city from habitats in  
685 the rural surroundings should reduce the probability of active colonisation, especially  
686 for less mobile species. Thus, the species assemblage in inner city gardens should  
687 primarily reflect local long-term conditions. While specimens of some of the  
688 taxonomical groups studied here actively or passively disperse through the air during  
689 at least part of their life cycle (flying rove beetles, ballooning juvenile spiders and  
690 flying sexuals of ants), they are less mobile through most of the life cycle. This may  
691 explain the effect that distance to the city centre had on the species richness,  
692 abundance and species composition of these groups.

693 Species composition of both ants and rove beetles was changed in inner city  
694 gardens. Colonisation events in isolated inner city gardens are important in these  
695 groups as many rove beetles are able to fly and in ants males and young queens  
696 disperse by flying. This could explain the high variation in species composition  
697 among inner city gardens in those two groups. In contrast, the less mobile gastropods  
698 showed high similarity in species composition among inner city gardens. A few  
699 generalist gastropod species (e.g. *Arion vulgaris* and *Hygromina cinctella*; [95]),  
700 some of them non-native, as well as millipede species [96] are frequently transported

701 with ornamental plants and vegetables including soil around the roots. Once  
702 introduced, these and other disturbance-tolerant species may persist in these habitats.

703

#### 704 **Importance of garden size and other local garden characteristics**

705 Size of private domestic gardens depends on historical city development, cultural  
706 aspects and traditions, economic factors and owner preferences [28,97], and thus may  
707 vary among cities [21]. The gardens examined in our study (mean area: 480 m<sup>2</sup>) were  
708 larger than domestic gardens investigated in Sheffield (173 m<sup>2</sup>; [98]), five cities in the  
709 UK (289 m<sup>2</sup>; [99]), and in the Greater Toronto Area, Canada (311 m<sup>2</sup>; [100]), but  
710 smaller than community gardens in California [101] and New York (Harlem and  
711 Bronx) [30]. However, in our study, gardens in the inner city (class “short distance to  
712 city centre”: 163 m<sup>2</sup>) were comparable in size to those of Sheffield (163 m<sup>2</sup>). Gardens  
713 in the suburban belt and the surroundings of Basel on average were larger (class  
714 “medium distance to city centre”: 533 m<sup>2</sup>, class “long distance to city centre”: 527  
715 m<sup>2</sup>) even though the size range included gardens comparable to inner city gardens.

716 Garden size is of importance as suggested by the general relationship between  
717 species richness and area (e.g. [102] for plants). Furthermore, management and  
718 planting decisions may depend on garden size [97]. Thus, various garden  
719 characteristics may also be influenced by garden size, indirectly affecting the local  
720 biodiversity. Indeed, we found that almost all garden characteristics considered,  
721 including habitat richness and structural diversity, were correlated with garden size;  
722 an exception being index of permeable border. This may confound analyses of species  
723 richness. We circumvented the problem by calculation of regressions of garden  
724 characteristics on garden size and using the residuals of these relationships for our  
725 models. Furthermore, in models analysing the effects of distance to city centre or

726 percentage of sealed area in the surroundings on species richness and abundance, we  
727 always considered area with vegetation as a measure of habitat size.

728 Compared to the landscape characteristic “distance to the city centre”, local  
729 garden characteristics had less power in explaining patterns of species richness and  
730 abundance in the different invertebrate groups studied. Yet, in our study, species  
731 richness of spiders and ants and abundance of spiders, millipedes and rove beetles  
732 were related to garden size (represented by area with vegetation), while native plant  
733 species richness influenced gastropod and ant species richness and millipede  
734 abundance. The effect of garden size on the diversity of ground-dwelling invertebrates  
735 has rarely been studied (but see e.g. [27,34,91,103]). Negative effects of garden size  
736 on beetle species richness [103] and positive effects on harvestmen abundance [34]  
737 were observed in domestic gardens in Sheffield.

738 Interestingly, neither species richness nor abundance of the groups examined were  
739 related to the index of permeable border, an exception being millipede abundance.  
740 This indicates that the borders of the gardens examined did not function as absolute  
741 barrier for most of the invertebrate groups examined. If neither index of permeable  
742 border nor garden size have an effect on the diversity of an invertebrate group, then  
743 this may indicate that the gardens should be considered as a functional unit with  
744 adjacent gardens as suggested by Smith et al. [103] and Goddard et al. [15].  
745 Furthermore, species may be brought into gardens passively as garden owners import  
746 plants or soil [95,96]. In such cases, the nature of the borders would not be relevant.

747 Contrary to our hypothesis, habitat richness and structural diversity only affected  
748 gastropod species richness. Structural diversity of domestic gardens has been found to  
749 influence arachnid richness by Smith et al. [103] and even more mobile groups such  
750 as bumblebees [104] and birds [105] (not examined in this study). Populations of

751 ground-dwelling invertebrates may respond less quickly to year-by-year variation in  
752 garden structural diversity than those of flying species. Various habitat features have  
753 been shown to positively influence the diversity of certain taxonomic groups in  
754 gardens [103]. This indicates that a rich variety of different habitat types should lead  
755 to high overall species richness. In our study, however, only gastropods species  
756 richness was influenced by habitat richness across the groups examined.

757

### 758 **Advantage of using multiple taxa in a biodiversity survey**

759 The diversity of a particular taxonomic group may not mirror the overall biodiversity  
760 [106]. Different taxonomical groups may respond to the same factor to a different  
761 degree or at different spatial scales. Furthermore, different taxa have different  
762 resource needs and habitat requirements. Yet, estimates of biodiversity are frequently  
763 based on the species richness of one or a few easily studied indicator groups (e.g.  
764 vascular plants, butterflies or birds), which may even partly depend on each other  
765 [106,107]. The power of such an approach depends on the indicators chosen to match  
766 the scale of the investigation unit. For mobile species such as wild bees, butterflies,  
767 and birds with large home ranges a single garden may only constitute a part of their  
768 home range or territory. We therefore focused on taxonomical groups, which are  
769 characterised by species of relatively low mobility, and which are able to complete  
770 their entire life cycle within a garden, thus matching the scale of an average domestic  
771 garden. The invertebrate groups examined in our study have no close specific  
772 relationships among each other (exceptions may occur at species level). Furthermore,  
773 these inconspicuous small invertebrates are often not noticed by the garden owners  
774 and not actively promoted or intentionally transported by them.



775 A further assumption is that the diversity of the indicator group is correlated with  
776 the diversity of other groups. This assumption has frequently not been tested [106]. In  
777 those studies, however, that considered this aspect, correlations were found between  
778 species richness of vascular plants and butterflies, but not among other taxonomical  
779 groups [106,108,109]. Similarly, in our study, species richness per garden was  
780 typically not correlated among the different invertebrate groups examined. An  
781 exception was ants, whose richness was correlated with that of gastropods and  
782 spiders. This suggests that in an ideal case, a biodiversity assessment is not based on a  
783 single indicator group but on several taxonomical groups with a range of different  
784 habitat requirements and belonging to different trophic levels [108,109].

785

## 786 **Conclusions and outlook**

787 We considered explicitly invertebrate groups that are not promoted by garden owners.  
788 Previous studies on biodiversity in domestic gardens usually focused on other groups,  
789 such as flowering plants, wild bees, butterflies and birds, whose diversity may at least  
790 partly reflect larger scale habitat diversity. The groups considered in our study are  
791 characterised by a low mobility of most of the constituent species, which is more in  
792 line with the spatial scale of domestic gardens than the home range of species from  
793 more mobile groups such as flying insects and birds. Nonetheless, we recorded  
794 relatively few effects of local garden characteristics on the richness and abundance in  
795 most of the groups examined. An exception was gastropods, which might be the  
796 group with the lowest active mobility. Indeed, most invertebrate groups were rather  
797 affected by landscape characteristics, in particular by distance to the city centre,  
798 suggesting that factors associated with this variable act as filter for the establishment  
799 of certain species.

800 Our study indicates that single domestic gardens, as part of a network of green  
801 infrastructure, might be of importance for the maintenance of regional biodiversity.  
802 Complementing our study with findings from other work on more mobile taxa in  
803 urban gardens, we suggest that garden owners can improve conditions for many  
804 species by increasing habitat diversity and implementing biodiversity-friendly  
805 management practices [110] and, for example, by replacing exotic plants with native  
806 species [31]. At a larger spatial scale, urban planners should consider the valuable  
807 contributions made by the mosaic of highly variable domestic gardens and need to  
808 promote the biodiversity therein by reducing urbanisation in the surroundings through  
809 measures like urban greenways increasing biological connectivity [12,13,20].

810

## 811 **Acknowledgments**

812 We in particular thank the owners for allowing us to access their gardens for this  
813 study. We thank B. Feldmann for rove beetle identifications, M. Raupach for  
814 woodlice identifications, K Hannig for ground beetle identifications, and V. Ingold  
815 and C. Ramage for assistance with the fieldwork.

816

817

## 818 **References**

- 819 1. United Nations General Assembly. *The New Urban Agenda*. New York:  
820 United Nations. 2016. Available from: [habitat3.org/the-new-urban-agenda/](http://habitat3.org/the-new-urban-agenda/)
- 821 2. Pauchard A, Barbosa O. Regional assessment of Latin America: rapid urban  
822 development and social economic inequity threaten biodiversity hotspots. In:  
823 Elmqvist T. et al., editors. *Urbanization, biodiversity and ecosystem services:*

- 824 challenges and opportunities. Dordrecht Heidelberg New York London:  
825 Springer; 2013. pp 589–608.
- 826 3. Piano E, Souffreau C, Merckx T, Baardsen LF, Backeljau T, Bonte D et al.  
827 Urbanization drives cross-taxon declines in abundance and diversity at  
828 multiple spatial scales. *Global Change Biol.* 2020; 26:1196–1211.
- 829 4. Tzoulas K, Korpela K, Venn S, Yli-Pelkonen V, Kazimiercak A, Nielelä J et  
830 al. Promoting ecosystem and human health in urban areas using green  
831 infrastructure: a literature review. *Landsc Urban Plan.* 2007; 81:167–178.
- 832 5. van den Berg AE, Custers MHG. Gardening promotes neuroendocrine and  
833 affective restoration from stress. *J Health Psych.* 2011; 16:3–11.
- 834 6. London Assembly: Environment Committee. On the right lines? Vegetation  
835 management on London’s railway embankments. Greater London Authority:  
836 London, UK; 2012.
- 837 7. Botzat A, Fischer LK, Kowarik I. Unexploited opportunities in understanding  
838 liveable and biodiverse cities. A review on urban biodiversity perception and  
839 valuation. *Global Environ Change.* 2016; 39:220–233.
- 840 8. Fischer LK, Honold J, Cvejić R, Delshammar T, Hilbert S, Laforteza R et al.  
841 Beyond green: Broad support for biodiversity in multicultural European cities.  
842 *Global Environ Change.* 2018; 49:35–45.
- 843 9. Martinoli D, Crump L, Zinstag J. Biodiversität, eine Garantie für Gesundheit?  
844 SCNAT. Swiss academies factsheets 2019;14(3).  
845 doi:10.5281/zenodo.3367099.
- 846 10. Jim CY, Chen SS. Comprehensive greenspace planning based on landscape  
847 ecology principles in compact Nanjing city, China. *Landsc Urban Plan.* 2003;  
848 65:95–116.

- 849 11. Koijnendijk CC. The forest and the city: the cultural landscape of urban  
850 woodland. 2nd ed. Cham, Netherlands: Springer; 2008.
- 851 12. Ignatieva M, Stewart GH, Meurk C. Planning and design of ecological  
852 networks in urban areas. *Landsc Ecol Engineer*. 2011; 7:17–25.
- 853 13. Kowarik I. The “Green Belt Berlin”: establishing a greenway where the Berlin  
854 Wall once stood by integrating ecological, social and cultural approaches.  
855 *Landsc Urban Plan*. 2019; 184:12–22.
- 856 14. Heidt V, Neef M. Benefits of urban green space for improving urban climate.  
857 In: Carreiro MM, Song Y-C, Wu J, editors. *Ecology, Planning, and*  
858 *Management of Urban Forests: International Perspectives*. New York:  
859 Springer; 2008. pp. 84–96.
- 860 15. Goddard MA, Dougill AJ, Benton TG. Scaling up from gardens: biodiversity  
861 conservation in urban environments. *Trends Ecol Evol*. 2010; 25:90–98.
- 862 16. Benedict MA, McMahon ET. *Green Infrastructure: Linking Landscapes and*  
863 *Communities*. Washington: Island Press; 2006.
- 864 17. Jones EL, Leather SR. Invertebrates in urban areas: a review. *Eur J Entomol*.  
865 2012; 109:463–478.
- 866 18. Vergnes A, Le Viol I, Clergeau P. Green corridors in urban landscapes affect  
867 the arthropod communities of domestic gardens. *Biol Conserv*. 2012;  
868 145:171–178.
- 869 19. Beninde J, Veith M, Hochkirch A. Biodiversity in cities needs space: a meta-  
870 analysis of factors determining intra-urban biodiversity variation. *Ecol Lett*.  
871 2015; 18:581–592.

- 872 20. Braschler B, Dolt C, Baur B. The function of a set-aside railway bridge in  
873 connecting urban habitat for animals: a case study. *Sustainability*. 2020;  
874 12:1194. doi:10.3390/su12031194.
- 875 21. Loram A, Tratalos, Warren, Gaston KJ. Urban domestic gardens (X): the  
876 extent & structure of the resource in five major cities. *Landsc Ecol*. 2007;  
877 22:601–615.
- 878 22. González-García A, Sal AG. Private urban greenspaces or ‘Patios’ as a key  
879 element in the urban ecology of tropical central America. *Human Ecol*. 2008;  
880 36:291–300.
- 881 23. Niemelä J. *Urban ecology: patterns, processes and applications*. Oxford:  
882 Oxford University Press; 2011.
- 883 24. Didham RK, Barbero F, Collins CM, Forister ML, Hassall C, Leather SR et al.  
884 Spotlight on insects: trends, threats and conservation challenges. *Insect*  
885 *Conserv Divers*. 2020; 13:99–102.
- 886 25. Didham RK, Basset Y, Collins CM, Leather SR, Littlewood NA, Menz MHM  
887 et al. Interpreting insect declines: seven challenges and a way forward. *Insect*  
888 *Conserv Divers*. 2020; 13:103–114.
- 889 26. Gardiner T, Didham RK. Glowing, glowing, gone? Monitoring long-term  
890 trends in glow-worm numbers in south-east England. *Insect Conserv Divers*.  
891 2020; 13:162–174.
- 892 27. Smith RM, Gaston KJ, Warren PH, Thompson K. Urban domestic gardens  
893 (V): relationships between landcover composition, housing and landscape.  
894 *Landsc Ecol*. 2005; 20:235–253.
- 895 28. Lin BB, Egerer MH. Global social and environmental change drives the  
896 management and delivery of ecosystem services from urban gardens: A case

- 897 study from Central Coast, California. *Global Environ Change*. 2020;  
898 60:102006. doi.org/10.1016/j.gloenvcha.2019.102006.
- 899 29. Colding J, Lundberg J, Folke C. Incorporating green-area user groups in urban  
900 ecosystem management. *Ambio*. 2006; 35:237–244.
- 901 30. Matteson KC, Langelotto GA. Determinates of inner city butterfly and bee  
902 species richness. *Urban Ecosyst*. 2010; 13:333–347.
- 903 31. Pardee GL, Philpott SM. Native plants are the bee’s knees: local and  
904 landscape predictors of bee richness and abundance in backyard gardens.  
905 *Urban Ecosyst*. 2014; 17:641–659.
- 906 32. Elton CS. *The pattern of animal communities*. London: Methuen; 1966.
- 907 33. Smith J, Chapman A, Eggleton P. B. Baseline biodiversity surveys of the soil  
908 macrofauna of London’s green spaces. *Urban Ecosyst*. 2006; 9:337–349.
- 909 34. Smith RM, Gaston KJ, Warren PH, Thompson K. Urban domestic gardens  
910 (VIII): environmental correlates of invertebrate abundance. *Biodiv Conserv*.  
911 2006; 15:2515–2545.
- 912 35. Philpott SM, Cotton J, Bichier P, Friedrich RL, Moorhead LC, Uno S et al.  
913 Local and landscape drivers of arthropod abundance, richness, and trophic  
914 composition in urban habitats. *Urban Ecosyst*. 2014; 17:513–532.
- 915 36. Lövei GL, Sunderland KD. Ecology and behavior of ground beetles  
916 (Coleoptera: Carabidae). *Ann Rev Entomol*. 1996; 41:231–256.
- 917 37. Bohac J. Staphylinid beetles as bioindicators. *Agr Ecosyst Environ*. 1999;  
918 74:357–372.
- 919 38. Paoletti MG, Hassall M. Woodlice (Isopoda: Oniscidae): their potential for  
920 assessing sustainability and use as bioindicators. *Agric Ecosyst Environ*. 1999;  
921 74:157–165.

- 922 39. Golovatch SI, Kime RD. Millipede (Diplopoda) distributions: A review. *Soil*  
923 *Organisms*. 2009; 81:565–597.
- 924 40. Lach L, Parr CL, Abbott KL, editors. *Ant Ecology*. Oxford: Oxford University  
925 Press; 2010.
- 926 41. Nicolai A, Ansart A. Conservation at a slow pace: terrestrial gastropods facing  
927 fast-changing climate. *Conserv Phys*. 2017; 5:  
928 [doi.org/10.1093/conphys/cox007](https://doi.org/10.1093/conphys/cox007).
- 929 42. Nyffeler M, Birkhofer K. An estimated 400–800 million tons of prey are  
930 annually killed by the global spider community. *Sci Nat*. 2017; 104: article  
931 number 30
- 932 43. Wolters V, Bengtsson J, Zaitsev AS. Relationship among the species richness  
933 of different taxa. *Ecology*. 2006; 87:1886–1895.
- 934 44. Gaston KJ. editor. *Biodiversity – A Biology of Numbers and Differences*.  
935 Oxford, UK: Blackwell Science; 1996.
- 936 45. Baur B. Basel Zoo and its native biodiversity between the enclosures: a new  
937 strategy of cooperation with academic institutions. *Int Zoo Yb*. 2011; 45: 48–  
938 54.
- 939 46. Vergnes A, Pellissier V, Lemperiere G, Rollard C, Clergeau P. Urban  
940 densification causes the decline of ground-dwelling arthropods. *Biodivers*  
941 *Conserv*. 2014; 23:1859–1877.
- 942 47. Buchholz S, Hanning K, Möller M, Schirmel J. Reducing management  
943 intensity and isolation as promising tools to enhance ground-dwelling  
944 arthropod diversity in urban grasslands. *Urban Ecosyst*. 2018; 21:1139–1149.
- 945 48. MacArthur R, Wilson EO. *The theory of island biogeography*. Princeton:  
946 Princeton University Press; 1967.

- 947 49. Van Heezik Y, Dickinson KJM, Freeman C, Porter S, Wing J, Barratt BIP. To  
948 what extent does vegetation composition and structure influence beetle  
949 communities and species richness in private gardens in New Zealand? *Landsc*  
950 *Urban Plan.* 2016; 151:79–88.
- 951 50. Moll RJ, Cepek JD, Lorch PD, Dennis PM, Tans E, Robison T et al. What  
952 does urbanization actually mean? A framework for urban metrics in wildlife  
953 research. *J Appl Ecol.* 2019; 56:1289–1300.
- 954 51. von der Lippe M, Buchholz S, Hiller A, Seitz B, Kowarik I. CityScapeLab  
955 Berlin: a research platform for untangling urbanization effects on biodiversity.  
956 *Sustainability.* 2020; 12(6): 2565 [doi.org/10.3390/su12062565](https://doi.org/10.3390/su12062565).
- 957 52. Tuf IH, Chmelík V, Dobroruka I, Hábová L, Hudcová P, Šipoš J et al. Hay-  
958 bait traps are a useful tool for sampling of soil dwelling millipedes and  
959 centipedes. In: Tuf IH, Tajovský K, editors. *Proceedings of the*  
960 *16th International Congress of Myriapodology, Olomouc, Czech Republic.*  
961 *ZooKeys.* 2015; 510: 97–207. <https://doi.org/10.3897/zookeys.510.9020>
- 962 53. Almquist S. Swedish Araneae, part 1 – families Atypidae to Hanidae  
963 (Linyphiidae excluded). *Insect Syst Evol.* 2005; Suppl 62:1–284.
- 964 54. Almquist S. Swedish Araneae, part 2 – families Dictynidae to Salticidae.  
965 *Insect Syst Evol.* 2006; Suppl 63: 285–603.
- 966 55. Roberts MJ. *The spiders of Great Britain and Ireland Volume 2: Linyphiidae*  
967 *and checklist.* Colchester: Harley Books; 1987.
- 968 56. Roberts MJ. *Spinnen Gids.* Baarn: Tirion; 1998.
- 969 57. Gruner H-E. 53. Teil: Krebstiere oder Crustacea V. Isopoda 2. Lieferung. In:  
970 *Die Tierwelt Deutschlands und der angrenzenden Meeresteile, begründet von*  
971 *Professor Dr. Friedrich Dahl.* Jena: VEB Gustav Fischer Verlag. 1966; 1–380.



- 972 58. Hopkin S. (2014): A key to the woodlice of Britain and Ireland. Telford: FSC  
973 Publications; 2014.
- 974 59. Müller-Motzfeld G, editor. Bd. 2, Adephaga 1: Carabidae (Laufkäfer). In:  
975 Freude H, Harde KW, Lohse GA, Klausnitzer B, editors. Die Käfer  
976 Mitteleuropas. 2. Auflage. Heidelberg and Berlin: Spektrum-Verlag; 2006.
- 977 60. Assing V, Frisch J, Kahlen M, Löbl I, Lohse GA, Puthz V et al. Familie  
978 Staphylinidae. - In: Lucht WH, Klausnitzer B. editors. Die Käfer  
979 Mitteleuropas Vol. 15. 4th Suppl. Heidelberg: Springer Spektrum; 1998. Pp.  
980 119–198.
- 981 61. Assing V, Schülke M. Supplemente zur mitteleuropäischen  
982 Staphylinidenfauna (Coleoptera, Staphylinidae). Entomol Blätt. 1999; 95:1–  
983 31.
- 984 62. Assing V, Schülke M. Supplemente zur mitteleuropäischen Staphylinidenfauna  
985 (Coleoptera, Staphylinidae). II. Entomol Blätt. 2001; 97:121–176.
- 986 63. Assing V, Schülke M. Supplemente zur mitteleuropäischen  
987 Staphylinidenfauna (Coleoptera, Staphylinidae). III. Entomol Blätt. 2007;  
988 102:1–78.
- 989 64. Assing V, Schülke M. Freude–Harde–Lohse–Klausnitzer – Die Käfer  
990 Mitteleuropas. Band 4. Staphylinidae I. Zweite neubearbeitete Auflage.  
991 Heidelberg and Berlin: Spektrum Akademischer Verlag. 2012; I–XII, 1–560.
- 992 65. Lohse GA. Tribus 15-19 (Schistogenini - Aleocharini). In: Freude H, Harde  
993 KW, Lohse GA, editors. Die Käfer Mitteleuropas, Bd. 5. Heidelberg: Springer  
994 Spektrum; 1974. Pp. 221–292.
- 995 66. Lohse GA. (1989): Ergänzungen und Berichtigungen zu Band 5. 23. Familie  
996 Staphylinidae (II) (Aleocharinae). In: Lohse GA, Lucht, WH, editors. Die

- 997 Käfer Mitteleuropas. 1. Supplementband mit Katalogteil. Heidelberg: Springer  
998 Spektrum; 1989. Pp. 185–240.
- 999 67. World Spider Catalog. World Spider Catalog. Version 20.0. Natural History  
1000 Museum Bern. 2019. Available from <http://wsc.nmbe.ch>. doi: 10.24436/2
- 1001 68. Schülke M, Smetana A. Staphylinidae. In: Löbl I, Löbl D, editors. Catalogue  
1002 of Palaearctic Coleoptera. Volume 2. Hydrophiloidea – Staphylinoidea.  
1003 Revised and updated edition. Leiden: Brill. 2015; pp. 304–1134.
- 1004 69. Oggier P, Zschokke S, Baur B. A comparison of three methods for assessing  
1005 the gastropod community in dry grasslands. *Pedobiologia* 1998; 42: 348–357.
- 1006 70. Tattersfield P, Warui CM, Seddon MB, Kiringe JW. Land-snail faunas of  
1007 afro-montane forests of Mount Kenya, Kenya: ecology, diversity and  
1008 distribution patterns. *J Biogeogr.* 2001; 28:843–861.
- 1009 71. Kerney MP, Cameron RAD, Jungbluth JH. *Die Landschnecken Nord- und*  
1010 *Mitteleuropas*. Paul Parey, Hamburg; 1983.
- 1011 72. Turner HJ, Kuiper GJ, Thew N, Bernasconi R, Rüetschi J, Wüthrich M, et al.  
1012 Atlas der Mollusken der Schweiz und Liechtensteins. *Fauna Helv.* 1998; 2:1–  
1013 527.
- 1014 73. Blower JG. Millipedes: Keys and Notes for the Identification of the Species.  
1015 In: Kermack DM, Barnes RSK, editors. *Synopsis of the British Fauna*.  
1016 London: Linnean Society; 1985.
- 1017 74. Pedroli-Christen A. *Faunistique des mille-pattes de Suisse (Diplopoda)*. *Doc*  
1018 *Faun Helv.* 1993; 14:1–167.
- 1019 75. Kime RD, Enghoff H. Atlas of European millipedes (Class Diplopoda),  
1020 volume 1, orders Polyxenida, Glomerida, Platydesmida, Siphonocryptidae,

- 1021 Polyzoniida, Callipodida, Polydesmida. Fauna Europaea Evertebrata 3,  
1022 Pensoft, Sofia-Moscow; 2011.
- 1023 76. Kime RD, Enghoff H. Atlas of European Millipedes 2: Order Julida (Class  
1024 Diplopoda). European J Taxon. 2017; 346:1–299.
- 1025 77. Seifert B. Die Ameisen Mittel- und Nordeuropas. Görlitz, Germany: Tauer:  
1026 lutra – Verlags- und Vertriebsgesellschaft; 2007.
- 1027 78. Crawley MJ. The R book. Chichester, UK: John Wiley and Sons; 2007.
- 1028 79. Anderson MJ. A new method for non-parametric multivariate analysis of  
1029 variance. Austral Ecol. 2001; 26:32–46.
- 1030 80. Anderson MJ, Willis TJ. Canonical analysis of principal coordinates: a useful  
1031 method of constrained ordination for ecology. Ecology. 2003; 84: 511–525.
- 1032 81. Rüetschi J, Stucki P, Müller O, Vicentini H, Claude F. Rote Liste der  
1033 Weichtiere (Schnecken und Muscheln). Gefährdete Arten der Schweiz, Stand  
1034 2010. Bundesamt für Umwelt, Bern, and Schweizer Zentrum für die  
1035 Kartographie der Fauna, Neuenburg. Umwelt-Vollzug. 2012; Nr. 1216.
- 1036 82. Bogyó D, Vilisics F, Moretti M, Trivellone V. Isopoda and Diplopoda fauna  
1037 of vineyards in Southeast-Switzerland. Oral presentation on the Conference:  
1038 12th Central European Workshop on soil zoology. České Budějovice, Czech  
1039 Republic: Abstract book 2013. 14.
- 1040 83. Neumeyer R. Ergänzung zu der frei lebenden Ameisen (Hymenoptera:  
1041 Formicidae) in der Schweiz. Entomo Helvetica. 2008; 1:43–48.
- 1042 84. Luka H, Nagel P, Feldmann B, Luka A, Gonseth Y. Checkliste der  
1043 Kurzflügelkäfer der Schweiz (Coleoptera: Staphylinidae ohne Pselaphinae).  
1044 Mitt Schweiz Entomol Ges. 2009; 82:61–100.

- 1045 85. Hahs AK, McDonnell MJ. Selecting independent measures to quantify  
1046 Melbourne's urban–rural gradient. *Landsc Urban Plan.* 2006; 78:435–448.
- 1047 86. Theobald DM. Placing exurban land-use change in a human modification  
1048 framework. *Front Ecol Environ.* 2004; 2:139–144. 2004
- 1049 87. Statistisches Amt des Kantons Basel-Stadt Stadt Basel: Ende 2019. Tabelle  
1050 t01.1.05. Available from: [https://www.statistik.bs.ch/haeufig-](https://www.statistik.bs.ch/haeufig-gefragt/einwohner/einwohnerzahl.html)  
1051 [gefragt/einwohner/einwohnerzahl.html](https://www.statistik.bs.ch/haeufig-gefragt/einwohner/einwohnerzahl.html).
- 1052 88. Bundesamt für Statistik. Die 25 grössten Agglomerationen unter Einbezug der  
1053 ausländischen Teil – Les 25 agglomérations les plus grandes avec les parties  
1054 transfrontalières. Bern: Bundesamt für Statistik; 2004.
- 1055 89. Penone C, Macon N, Julliard R, Le Viol I. Do railway edges provide  
1056 functional connectivity for plant communities in an urban context? *Biol*  
1057 *Conserv.* 2012; 148:126–133.
- 1058 90. Sattler T, Duelli P, Obrist MK, Arlettaz R, Moretti. Response of arthropod  
1059 species richness and functional groups to urban habitat structure and  
1060 management. *Landsc Ecol.* 2010; 25:941–954.
- 1061 91. Egerer MH, Arel C, Otoshi MD, Quistberg RD, Bichier P, Philpott SM. Urban  
1062 arthropods respond variably to changes in landscape context and spatial scale.  
1063 *J Urban Ecol.* 2017; 3:1–10. doi:10.1093/jue/jux001.
- 1064 92. Gosling L, Sparks TH, Araya Y, Harvey M, Ansine J. Differences between  
1065 urban and rural hedges in England revealed by a citizen science project. *BMC*  
1066 *Ecol.* 2016; 16(Suppl 1):515.
- 1067 93. Blair RB, Launer AE. Butterfly diversity and human land use: species  
1068 assemblages along an urban gradient. *Biol Conserv.* 1997; 80:113–125.

- 1069 94. Porter EE. Woody vegetation and canopy fragmentation along a forest-to-  
1070 urban gradient. *Urban Ecosyst.* 2001;5:131–151.
- 1071 95. Kramarenko SS. Active and passive dispersal of terrestrial mollusks: a review.  
1072 *Ruthenica.* 2014; 24:1–14.
- 1073 96. Stoey P, Zapparoli M, Golovatch S, Enghoff H, Akkari N, Barber A.  
1074 *Myriapods (Myriapoda).* Chapter 7.2. *BioRisk.* 2010; 4:97–130.
- 1075 97. Van Heezik Y, Freeman C, Porter S, Dickinson KJ. Garden size, householder  
1076 knowledge, and socio-economic status influence plant and bird diversity at the  
1077 scale of individual gardens. *Ecosystems.* 2013; 16:1442–1454.
- 1078 98. Gaston KJ, Warren PH, Thompson K, Smith RM. Urban domestic gardens  
1079 (IV): the extent of the resource and its associated features. *Biodiv Conserv.*  
1080 2005; 14:3327–3349.
- 1081 99. Loram A, Warren PH, Gaston KJ. Urban domestic gardens (XIV): the  
1082 characteristics of gardens in five cities. *Environm Manag.* 2008; 42:361–376.
- 1083 100. Sperling CD, Lortie CJ. The importance of urban backgardens on plant  
1084 and invertebrate recruitment: a field microcosm experiment. *Urban Ecosyst.*  
1085 2010; 13:223–235.
- 1086 101. Egerer MH, Liere H, Lin BB, Jha S, Bichier P, Philpott SM. Herbivore  
1087 regulation in urban agroecosystems: direct and indirect effects. *Basic Appl*  
1088 *Ecol.* 2018; 29:44–54.
- 1089 102. Thompson K, Hodgson JG, Smith RM, Warren PH, Gaston KJ. Urban  
1090 domestic gardens (III): Composition and diversity of lawn floras. *J Veg Sci.*  
1091 2004; 15:373–378.

- 1092 103. Smith RM, Warren PH, Thomson K, Gaston KJ. Urban domestic  
1093 gardens (VI): environmental correlates of invertebrate species richness. *Biodiv*  
1094 *Conserv.* 2006; 15:2415–2438.
- 1095 104. Osborne JL, Martin AP, Shortall CR, Todd AD, Goulson D, Knight  
1096 ME et al. Quantifying and comparing bumblebee nest densities in gardens and  
1097 countryside habitats. *J Appl Ecol.* 2008; 45:784–792.
- 1098 105. Cannon AR, Chamberlain DE, Toms MP, Hatchwell BJ, Gaston KJ.  
1099 Trends in the use of private gardens by wild birds in Great Britain 1995–2002.  
1100 *J Appl Ecol.* 2005; 42:659–671.
- 1101 106. Oliver I, Beattie AJ. Designing a cost-effective invertebrate survey: a  
1102 test of methods for rapid assessment of biodiversity. *Ecol Appl.* 1996; 6:594–  
1103 607.
- 1104 107. Cameron KH, Leather SR. How good are carabid beetles (Coleoptera,  
1105 Carabidae) as indicators of invertebrate abundance and order richness?  
1106 *Biodivers Conserv.* 2012; 21:763–779.
- 1107 108. Lawton JH, Bignell DE, Bolton B, Bloemers GF, Eggleton P,  
1108 Hammond PM et al. Biodiversity inventories, indicator taxa and effects of  
1109 habitat modification in tropical forest. *Nature.* 1998; 391:72–76.
- 1110 109. Niemelä J, Baur B. Threatened species in a vanishing habitat: plants  
1111 and invertebrates in calcareous grasslands in the Swiss Jura mountains. *Biodiv*  
1112 *Conserv.* 1998; 7:1407–1416.
- 1113 110. Egerer MH, Bichler P, Philpott SM. Landscape and local habitat  
1114 correlates of lady beetle abundance and species richness in urban agriculture.  
1115 *Ann Entomol Soc America.* 2017; 110:97–103.  
1116  
1117

1118

1119 **Supporting information**

1120 **S1 Table. Species richness correlations among taxonomical groups within 35**  
1121 **gardens (Pearson correlations (R) or Spearman correlations (R<sub>s</sub>)). P-values are**  
1122 **given in brackets.**

1123

1124 **S2 Table. Means and ranges for garden and landscape characteristics (n = 35 in**  
1125 **all cases).**

1126

1127 **S3 Table. Local garden characteristics and landscape characteristics per garden.**

1128

1129 **S4 Table. Abundance of invertebrate species recorded in 35 domestic gardens.**  
1130 **For ants presence data is given.**

1131

1132 **S5 Table. Species richness and percentage of the species pool of all gardens for**  
1133 **seven taxonomical groups of ground-dwelling invertebrates for 35 domestic**  
1134 **gardens.**

1135

1136 **S6 Table. Numbers of specimens collected for each of six taxonomical groups in**  
1137 **35 domestic gardens.**

1138

1139 **S7 Table. Summaries of GLMs testing the effects of landscape factors (distance**  
1140 **to city centre or percentage of sealed area in the surroundings), garden size (area**  
1141 **with vegetation) and local garden characteristics, as well as of the interaction**  
1142 **between the landscape factors and garden size on species richness and**  
1143 **abundance of different taxonomical groups.** As the two landscape factors were  
1144 intercorrelated, separate models were used to assess their effects. To test whether the  
1145 assignment to classes with different distance to city centre, different percentages of  
1146 sealed area in the surroundings, or different garden sizes affected the outcomes,  
1147 analyses were repeated using models that treated all factors as continuous variables.  
1148 This resulted in four different model types (models 1–4). Full models were stepwise  
1149 reduced by omitting variables explaining little variation ( $F < 1.0$ ) starting with the  
1150 variable with the lowest F-value. However, the main landscape factors and garden  
1151 size were always retained in the model. Species richness was log-transformed. All  
1152 models used a quasipoisson error distribution and log-link function.

1153

1154 **S1 Fig. Distribution of Sørensen-indices of species compositions obtained from**  
1155 **all combinations of each two gardens for gastropods (a), spiders (b), millipedes**  
1156 **(c), woodlice (d), ants (e), and rove beetles (f).**

1157

1158 **S2 Fig. Effects of distance to the city centre (three classes) on the Sørensen-**  
1159 **indices of species compositions of gastropods (a), spiders (b), millipedes (c),**  
1160 **woodlice (d), ants (e), and rove beetles (f).** The Sørensen-indices of species  
1161 compositions were calculated for all combinations of each two gardens belonging to  
1162 the same distance class. Different letters indicate significant differences among  
1163 distance classes (Tukey's HSD,  $P < 0.05$ ).

1164

1165

1166



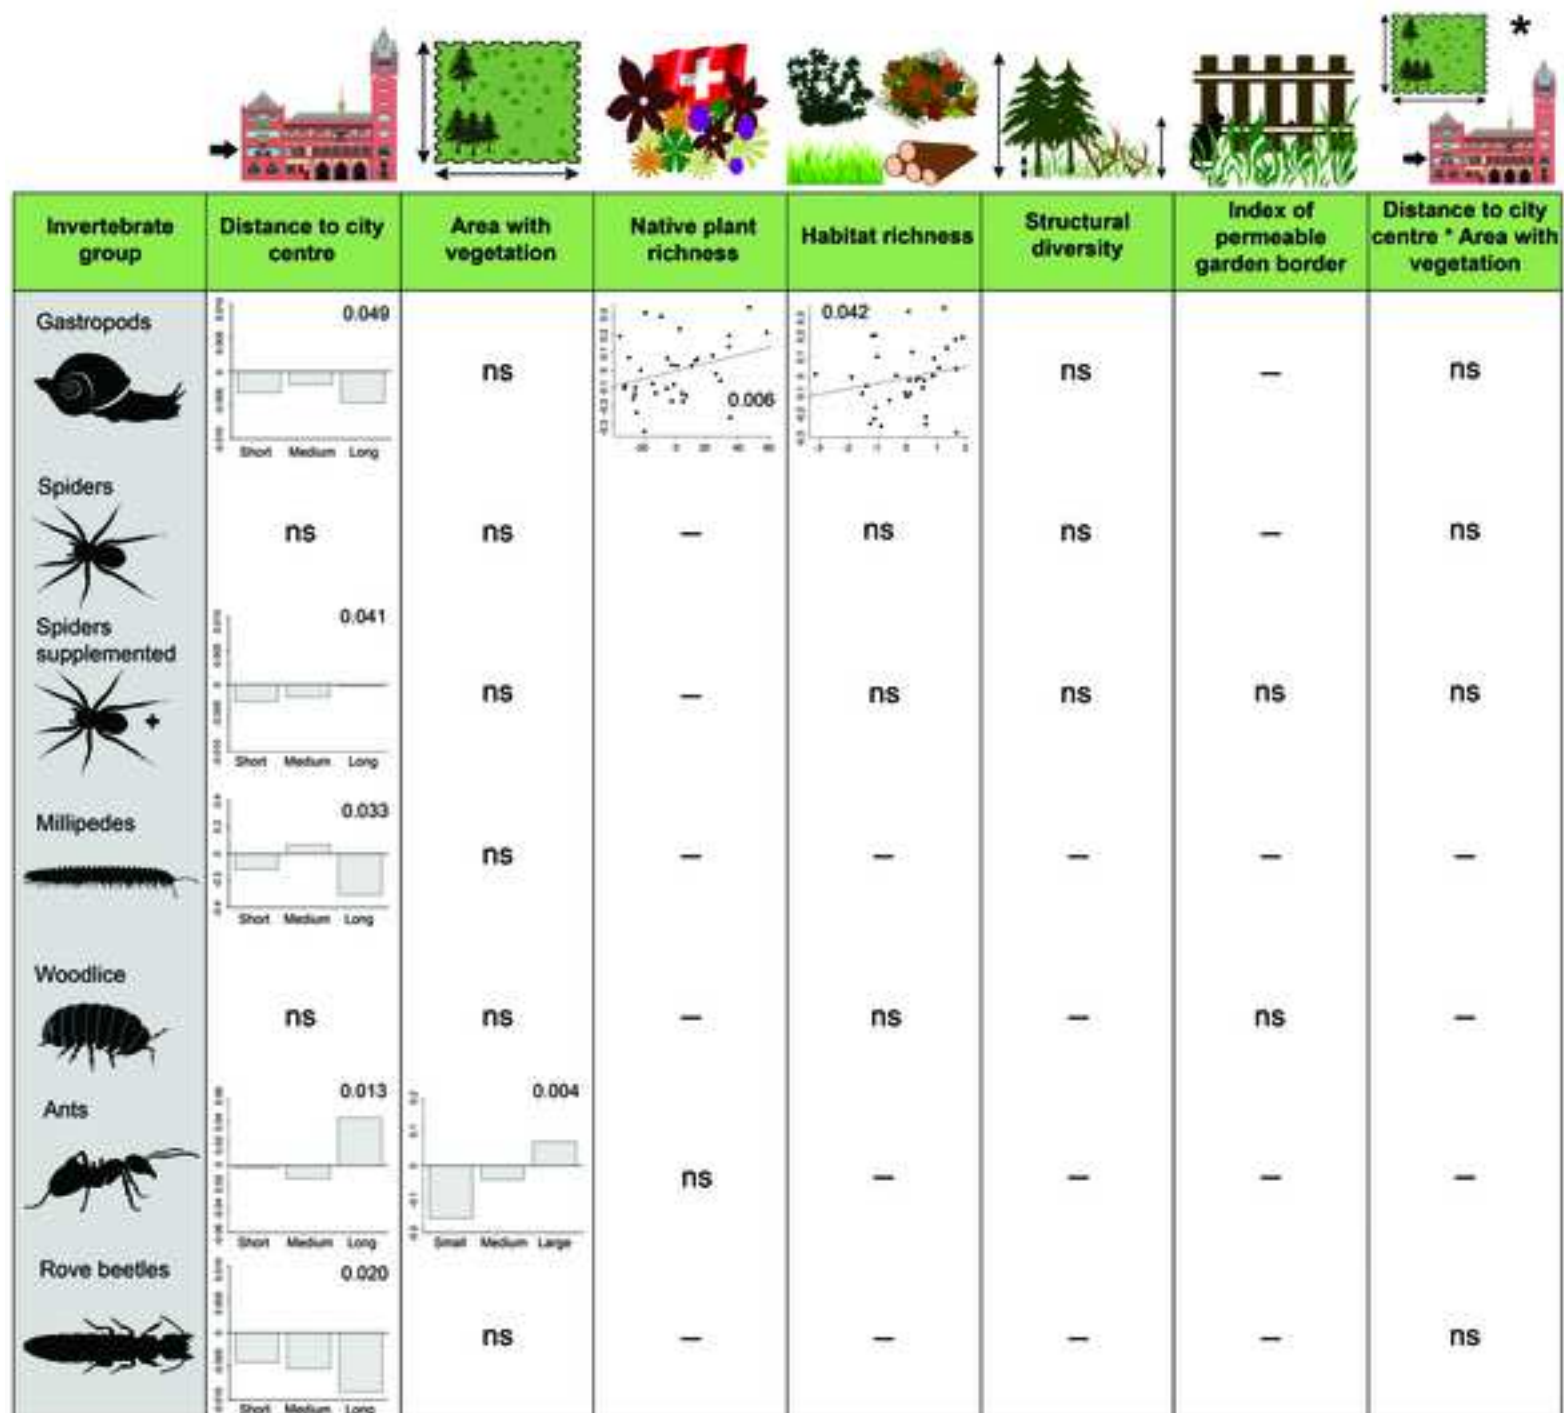

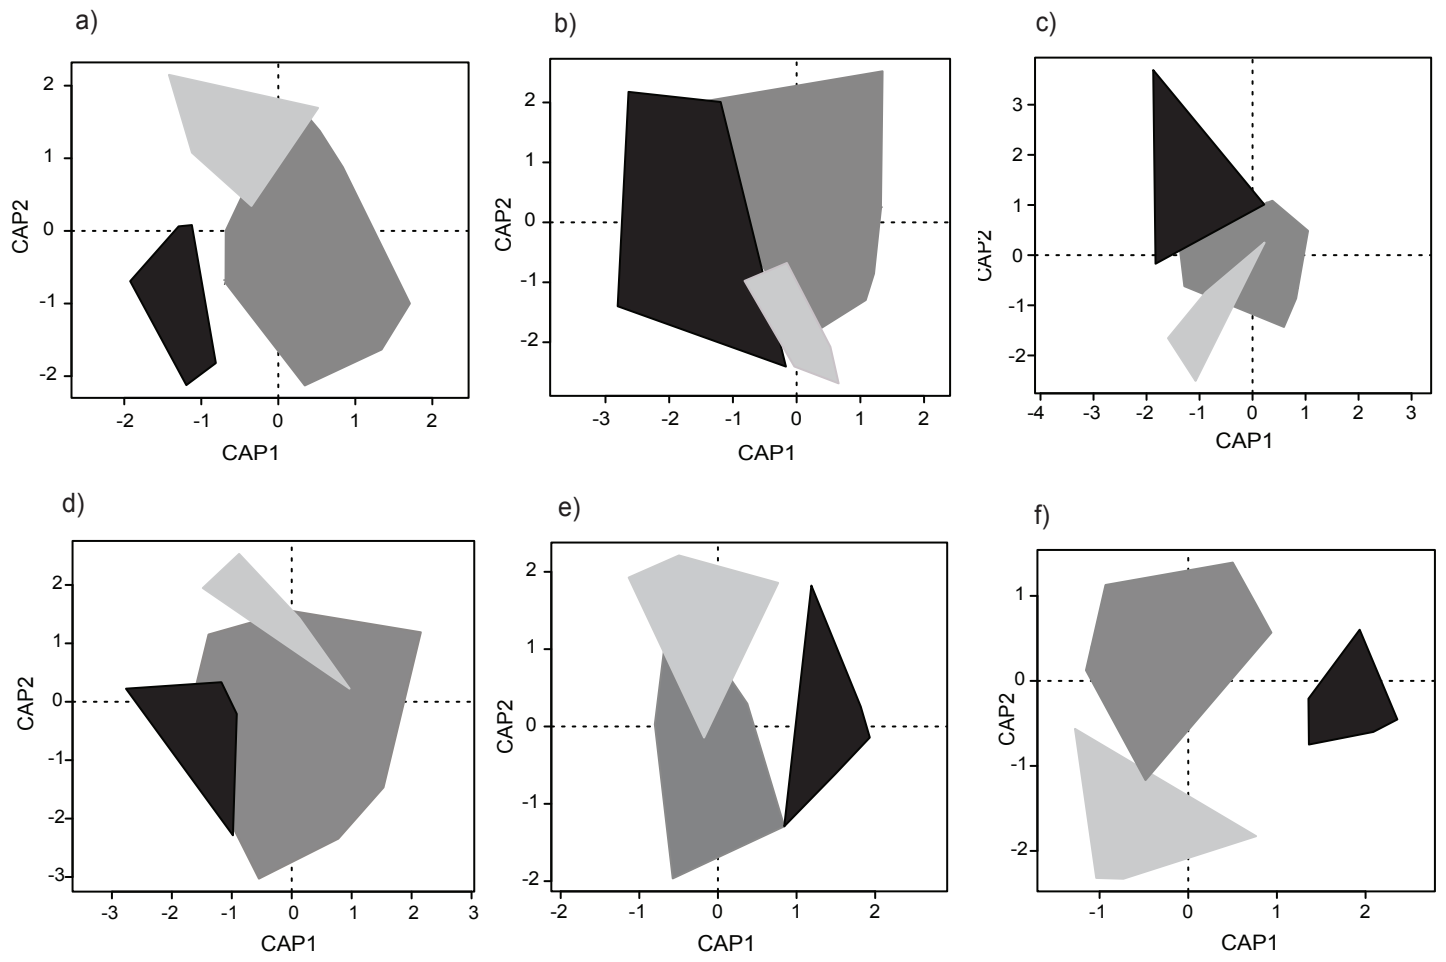



Click here to access/download  
**Supporting Information**  
S1 Table.docx





Click here to access/download  
**Supporting Information**  
S2 Table.docx





Click here to access/download  
**Supporting Information**  
S3 Table.xls



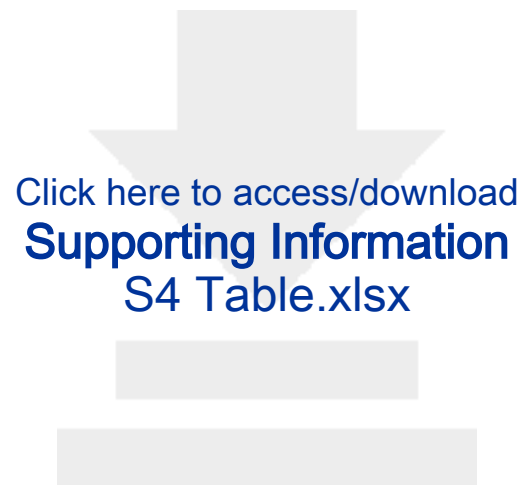

Click here to access/download  
**Supporting Information**  
S4 Table.xlsx



Click here to access/download  
**Supporting Information**  
S5 Table.xls





Click here to access/download  
**Supporting Information**  
S6 Table.xls





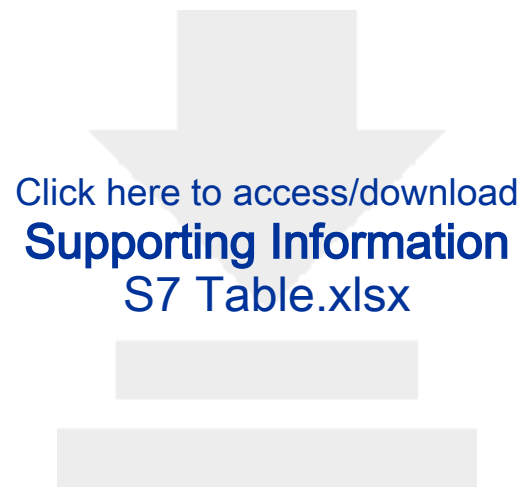

Click here to access/download  
**Supporting Information**  
S7 Table.xlsx

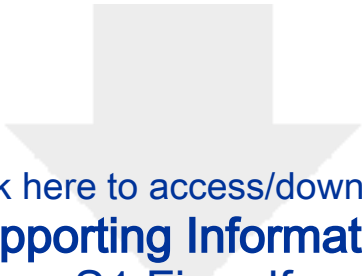

Click here to access/download  
**Supporting Information**  
S1 Fig.pdf





Click here to access/download  
**Supporting Information**  
S2 Fig.pdf



Supplement: pone.0240061.s012.pdf [file pone.0240061.s012.pdf]
