# Supplementary material for: Ground-dwelling invertebrate diversity in domestic gardens along a rural-urban gradient: Landscape characteristics are more important than garden characteristics
Source: PubMed Central journal article supplement (PMC7531831; doi:10.1371/journal.pone.0240061), 2020-10-02

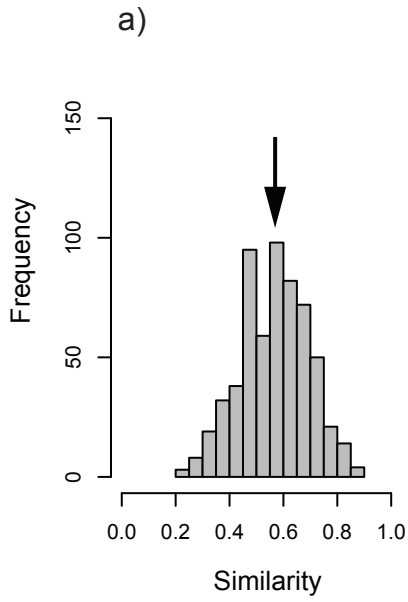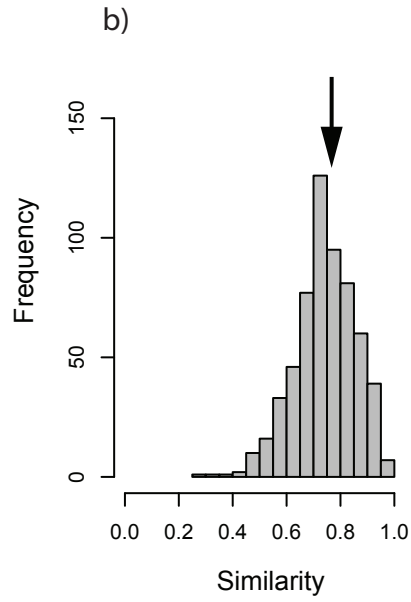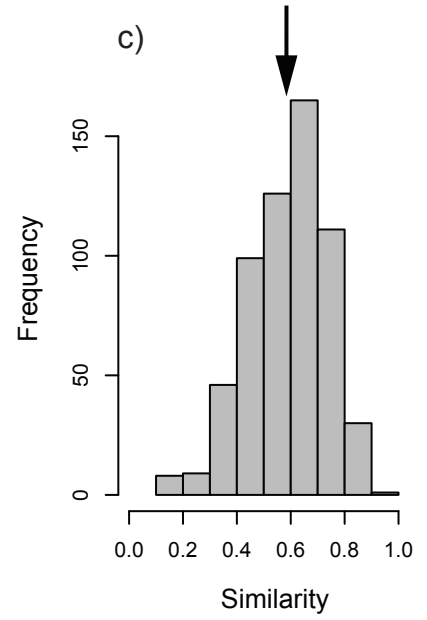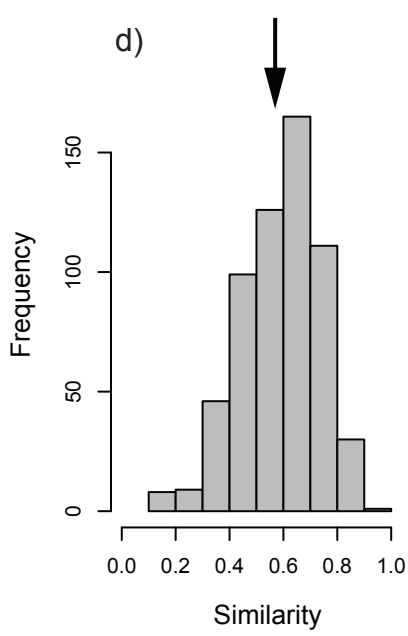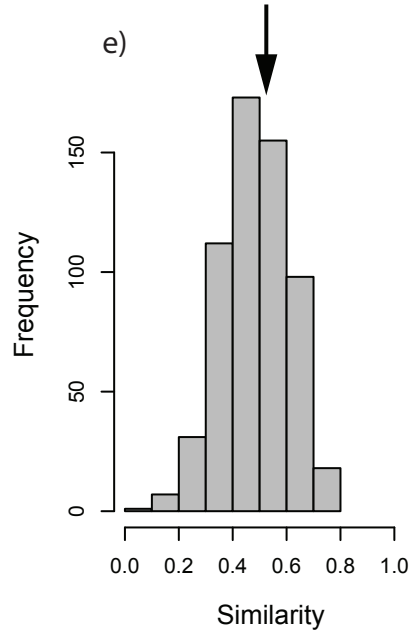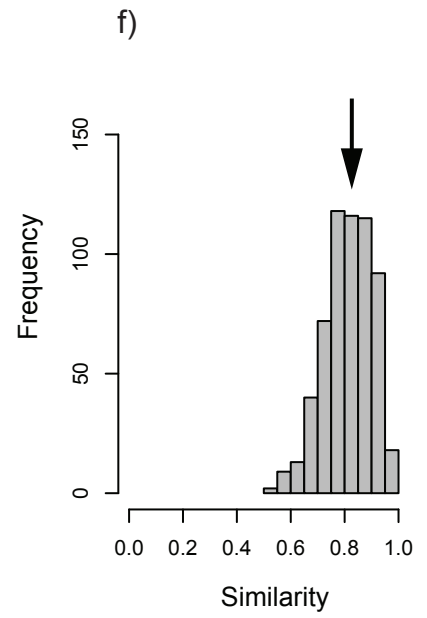

Supplement: pone.0240061.s009.pdf [file pone.0240061.s009.pdf]
